# Supplementary material
Source: bioRxiv or medRxiv preprint supplement (https://medrxiv.org/highwire/filestream/88674/field_highwire_adjunct_files/0/2020.07.06.20147512-1.pdf)

# Supplemental Figure S1

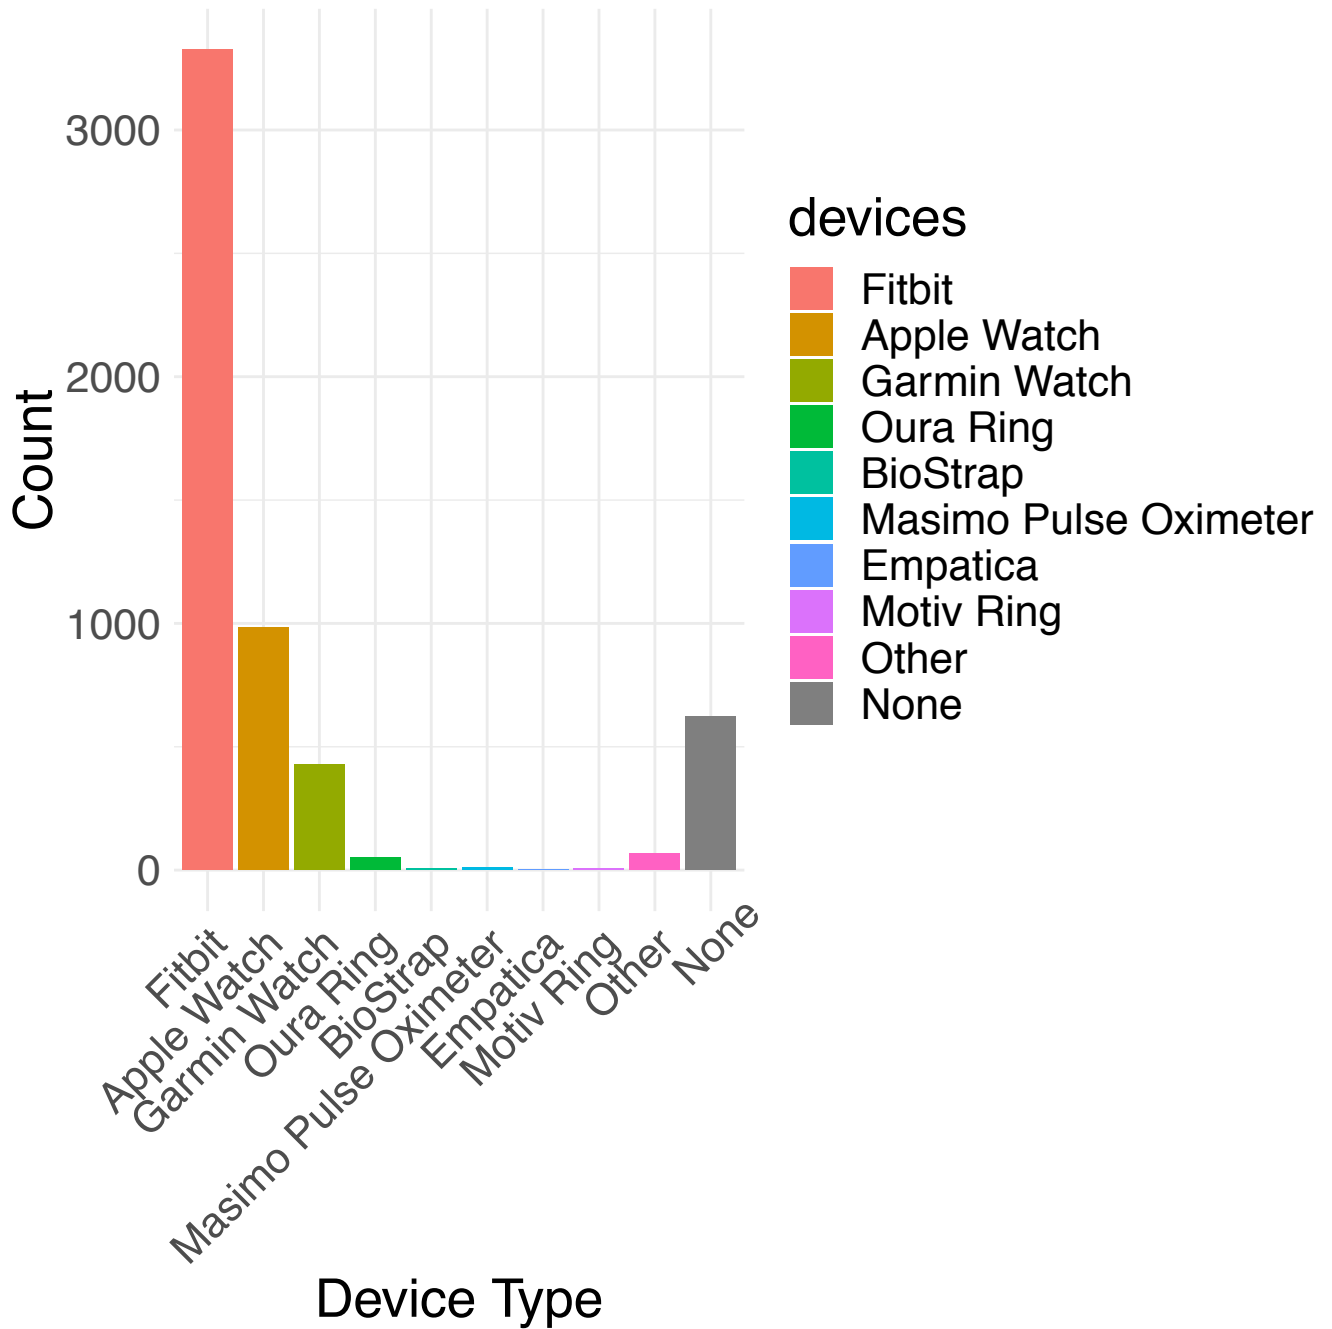

# Supplemental Figure S2

## offline detection for AJWW3IY

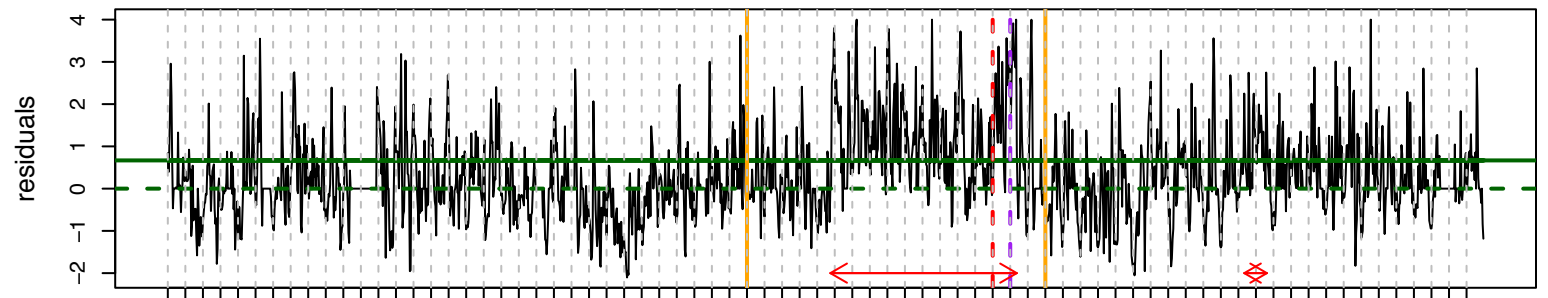

## online detection for AJWW3IY

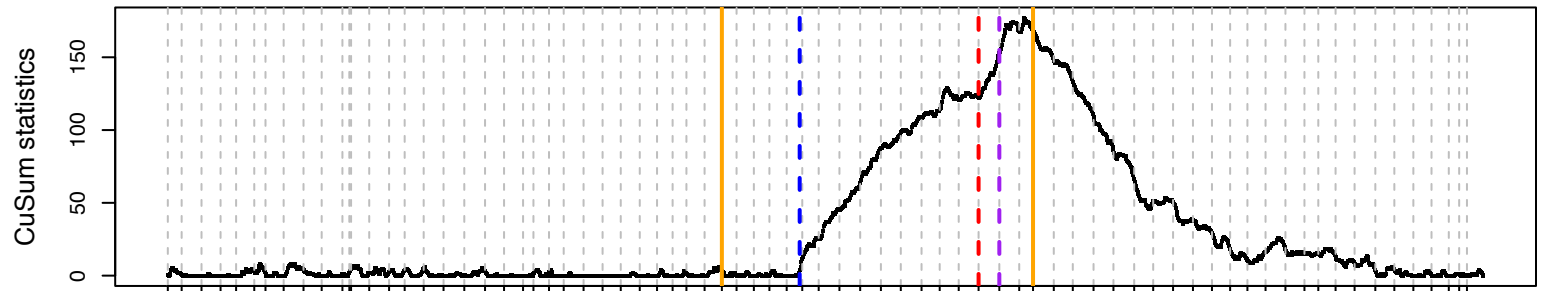

## offline detection for AKXN5ZZ

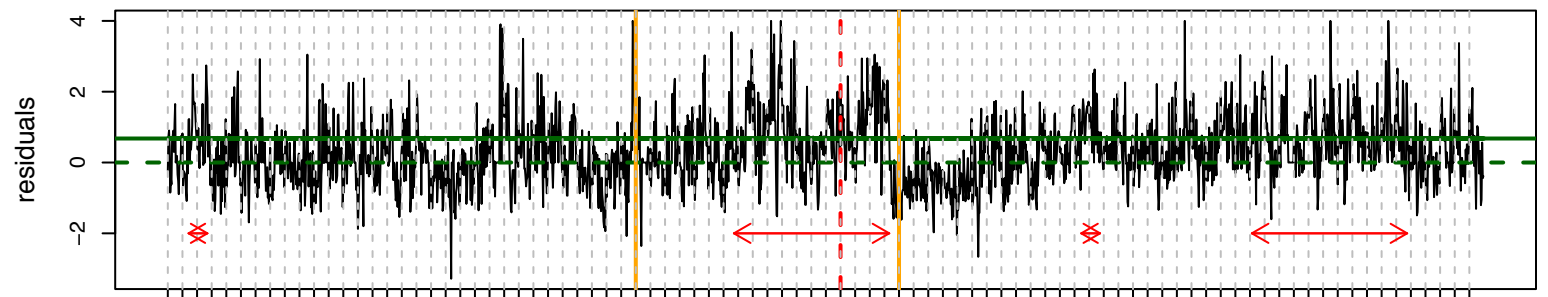

## online detection for AKXN5ZZ

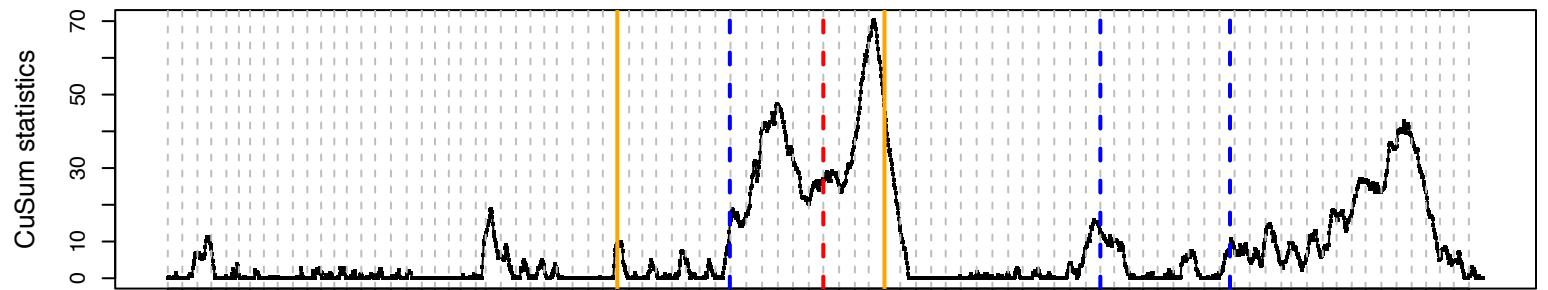

## offline detection for AAXAA7Z

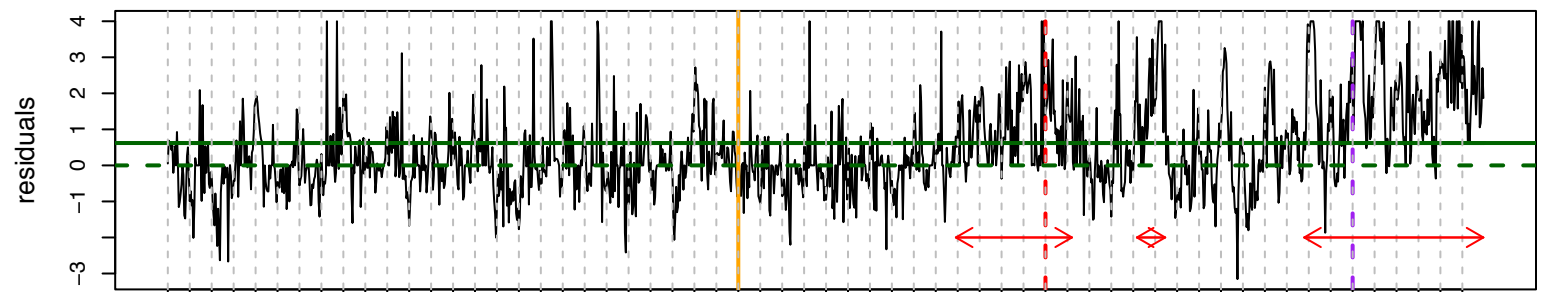

## online detection for AAXAA7Z

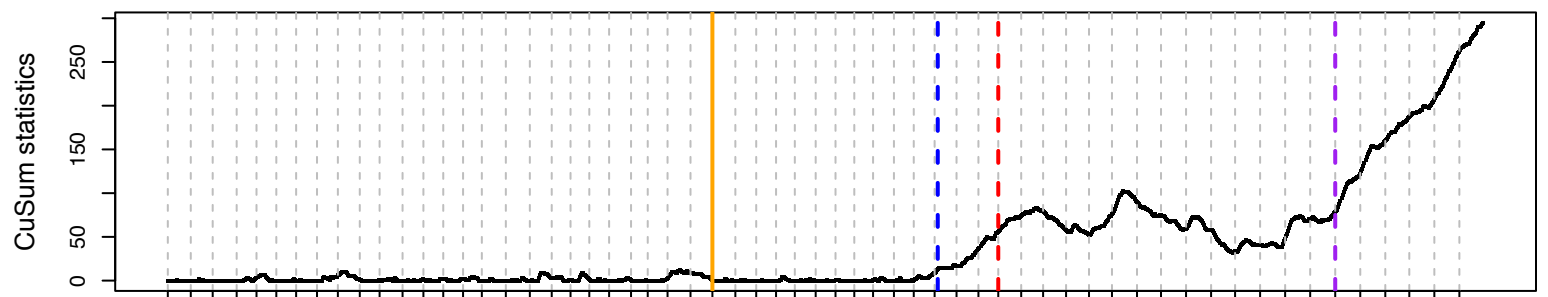

offline detection for APGIB2T

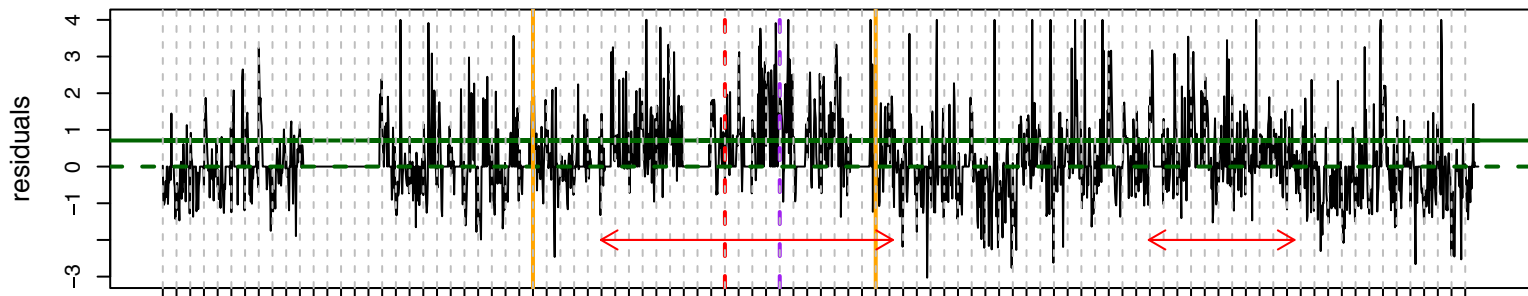

online detection for APGIB2T

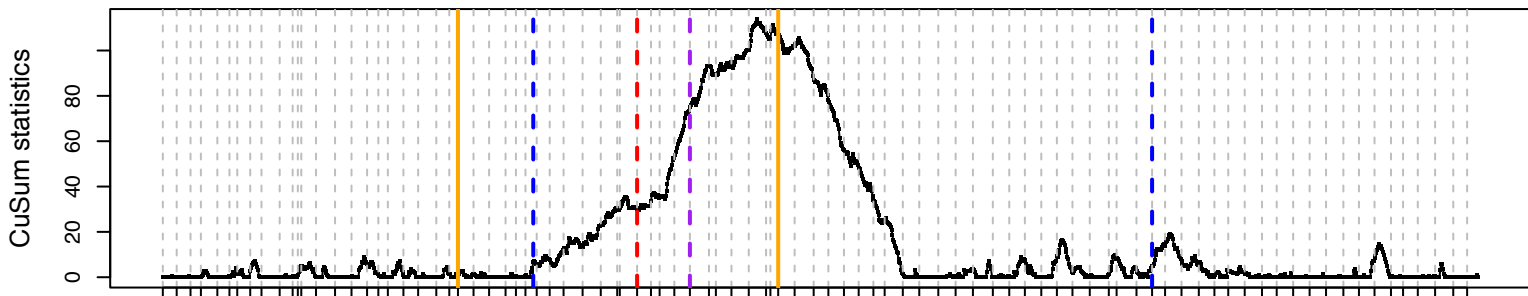

offline detection for A0NVTRV

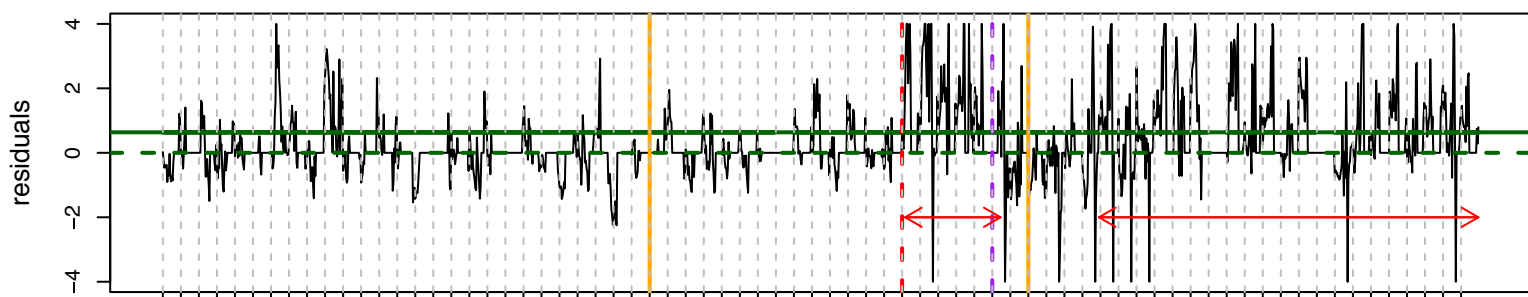

online detection for A0NVTRV

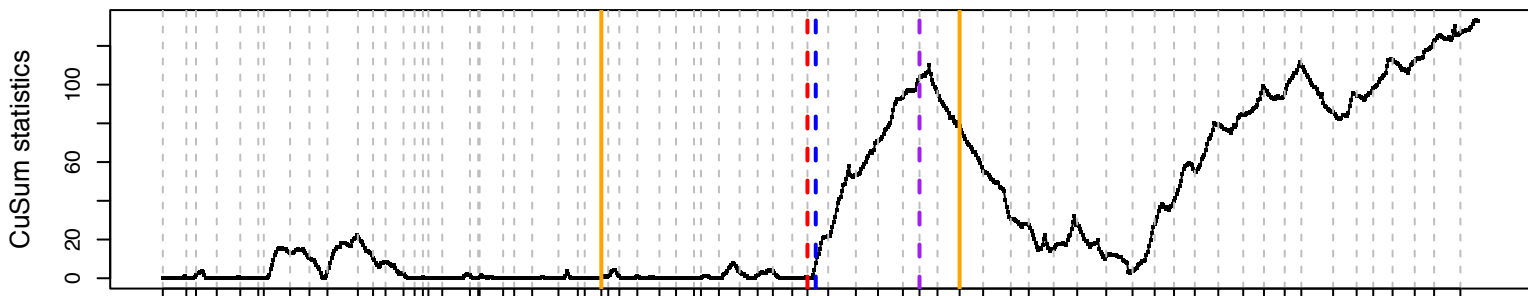

offline detection for ASFODQR

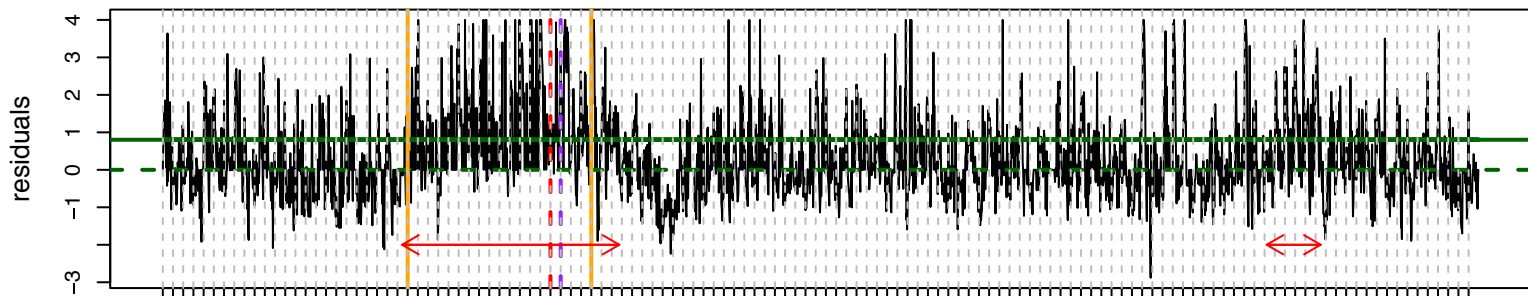

online detection for ASFODQR

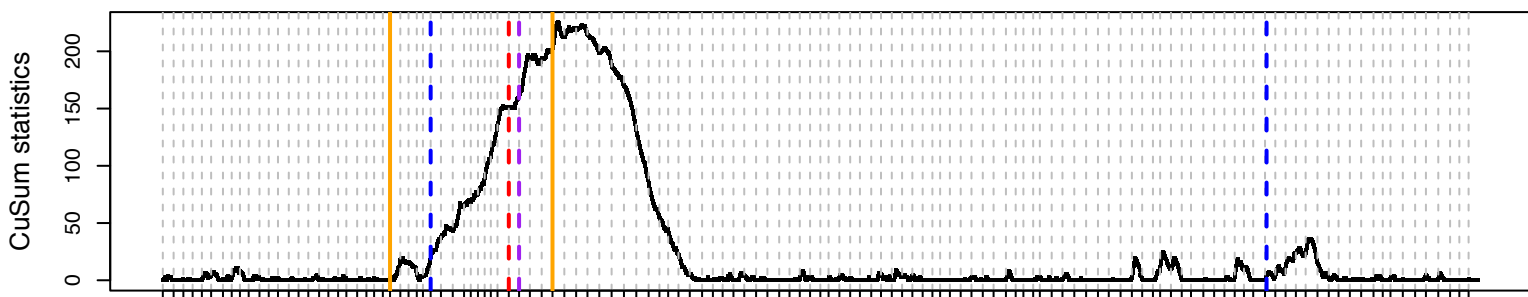

offline detection for AS2MVDL

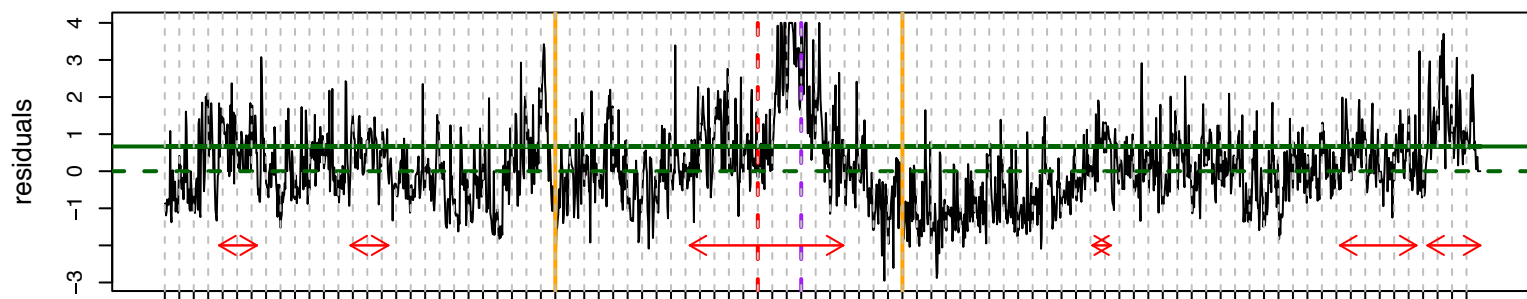

online detection for AS2MVDL

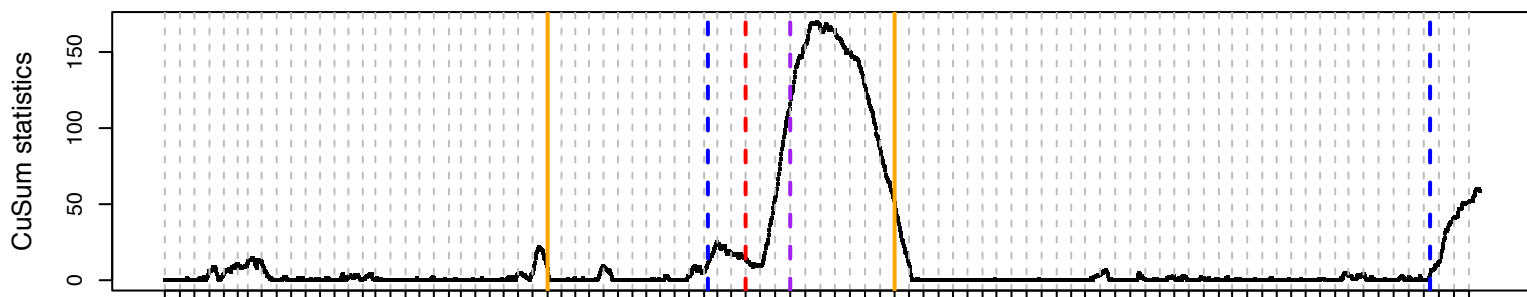

offline detection for A4G0044

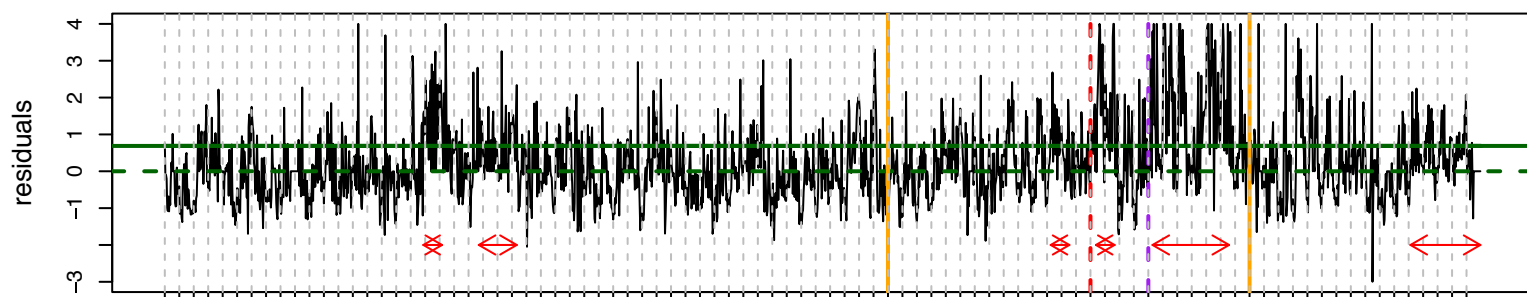

online detection for A4G0044

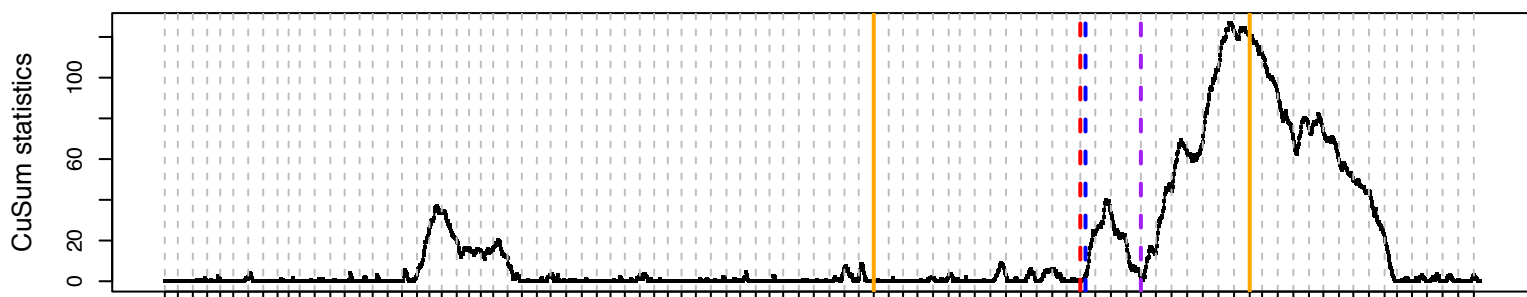

offline detection for A0VFT1N

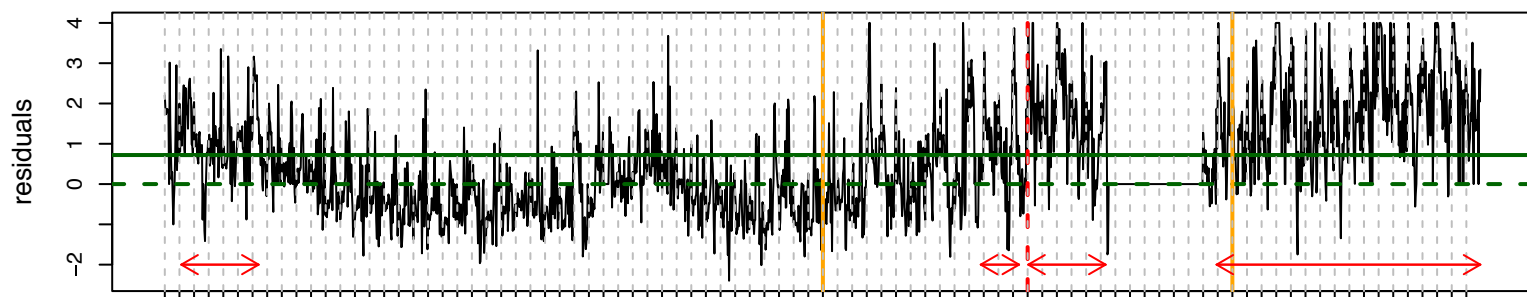

online detection for A0VFT1N

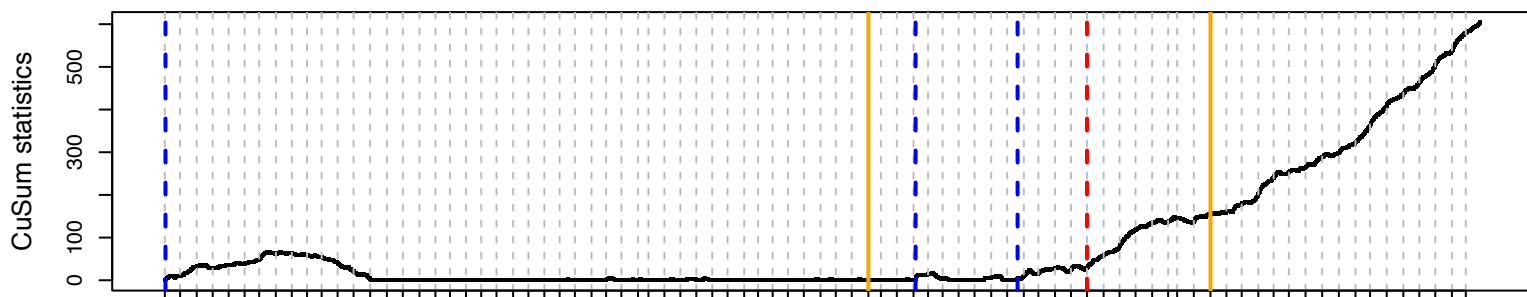

offline detection for AV2GF3B

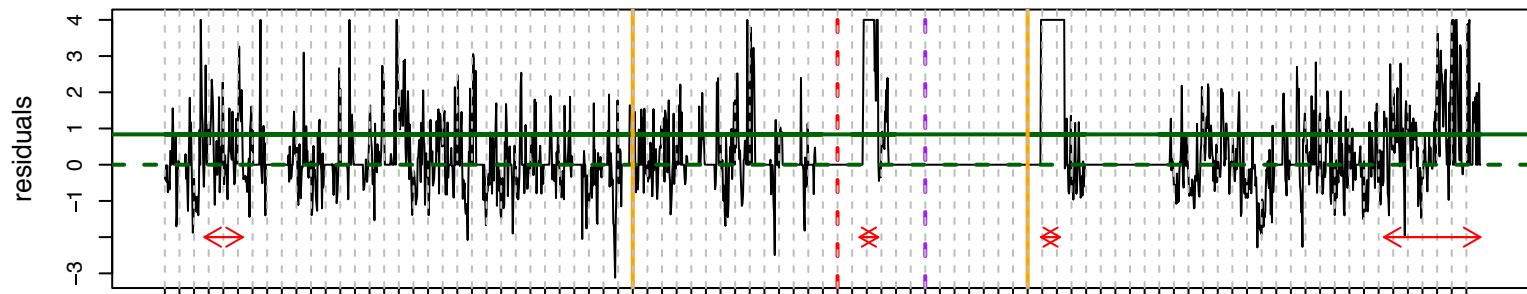

online detection for AV2GF3B

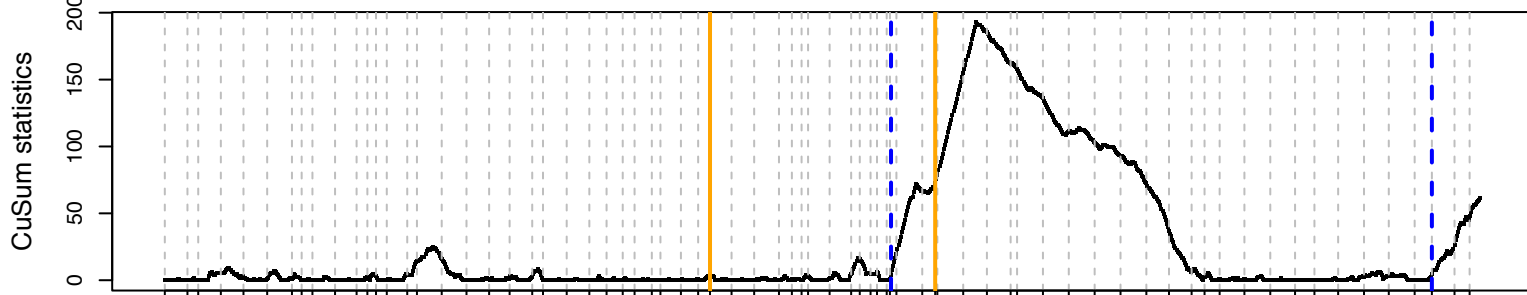

offline detection for AZIK4ZA

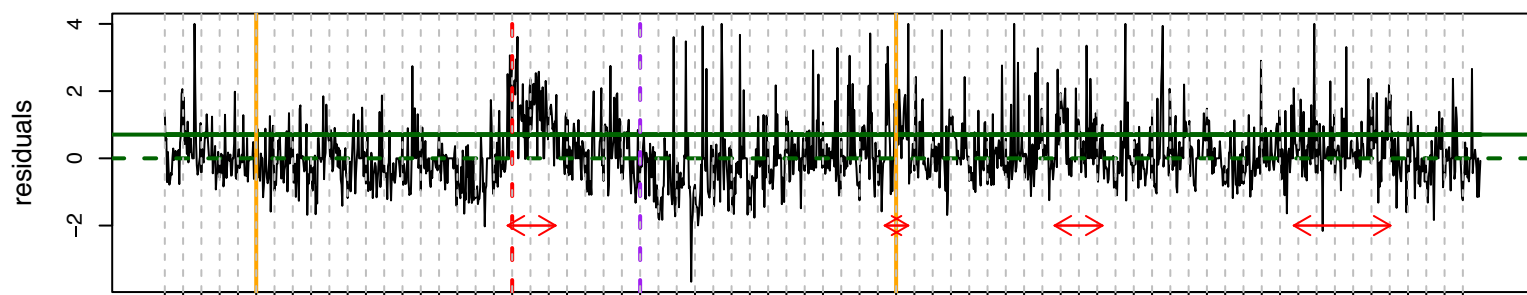

online detection for AZIK4ZA

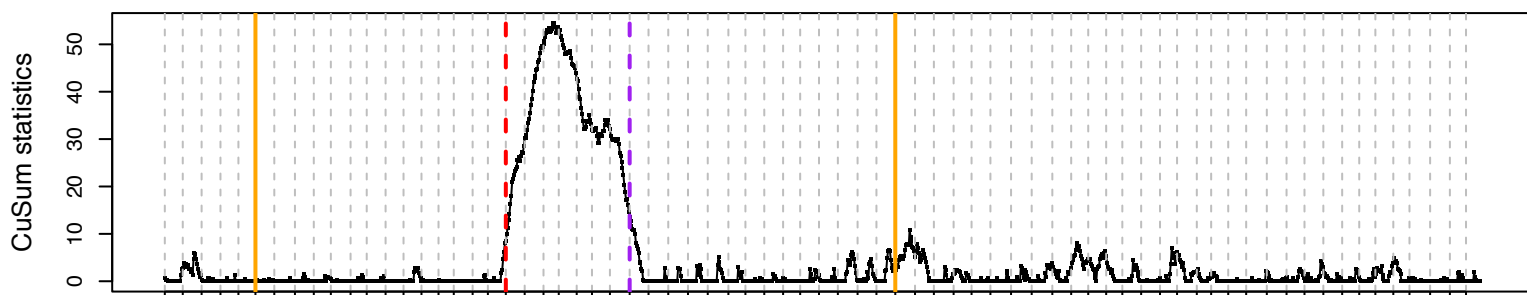

offline detection for ATHKM6V

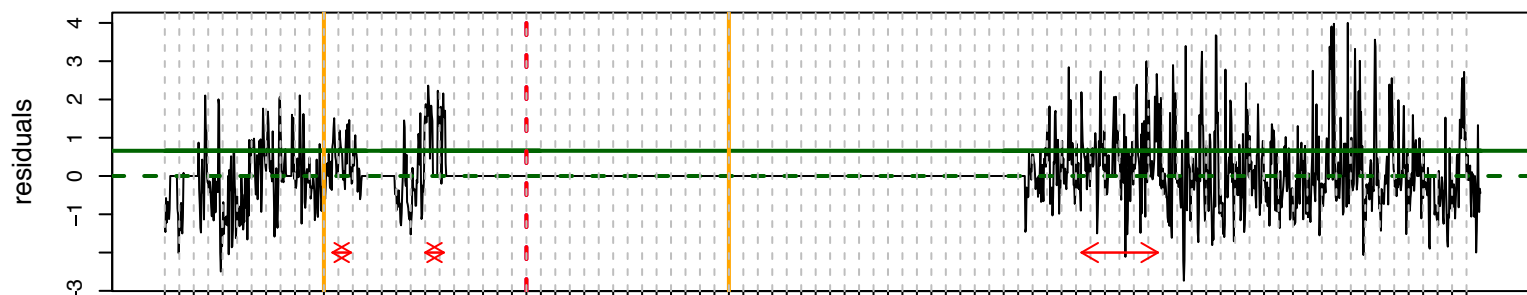

online detection for ATHKM6V

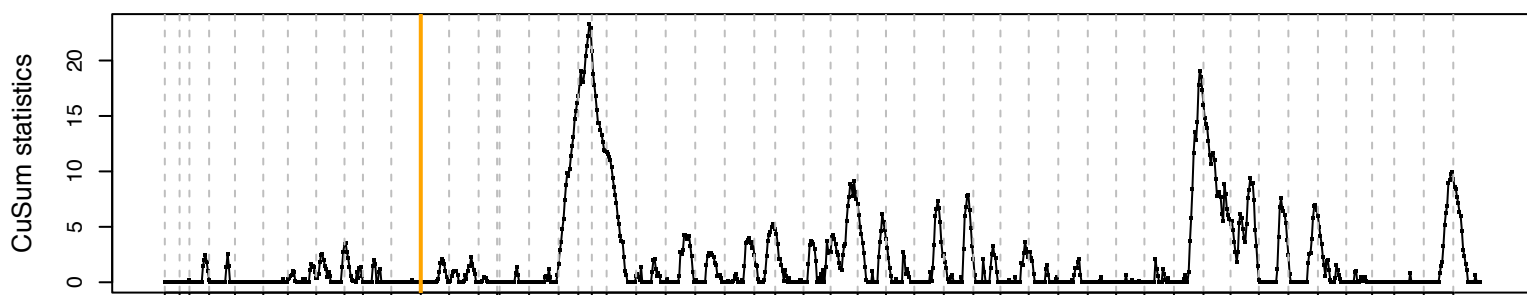

offline detection for AHYIJDV

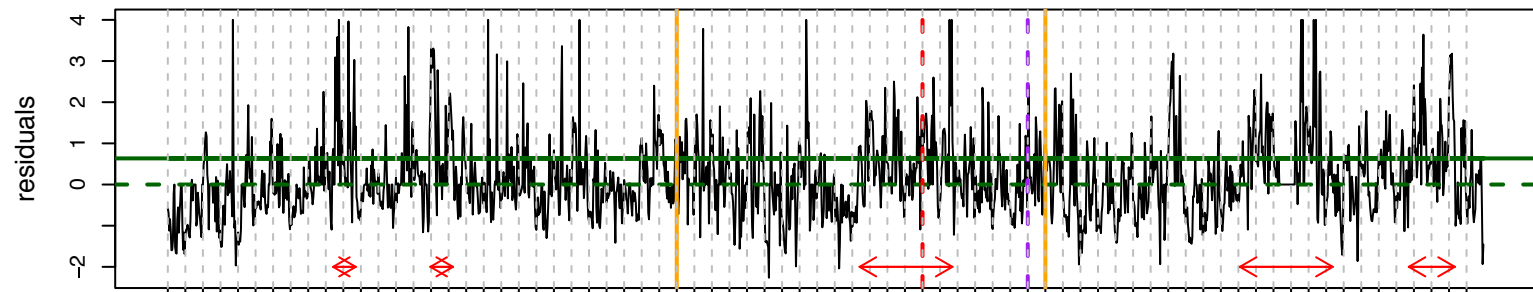

online detection for AHYIJDV

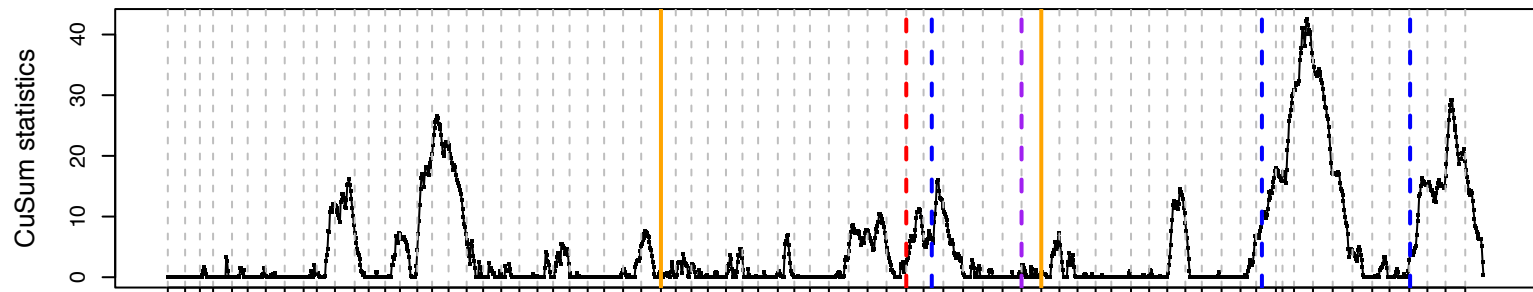

offline detection for AUY8KYW

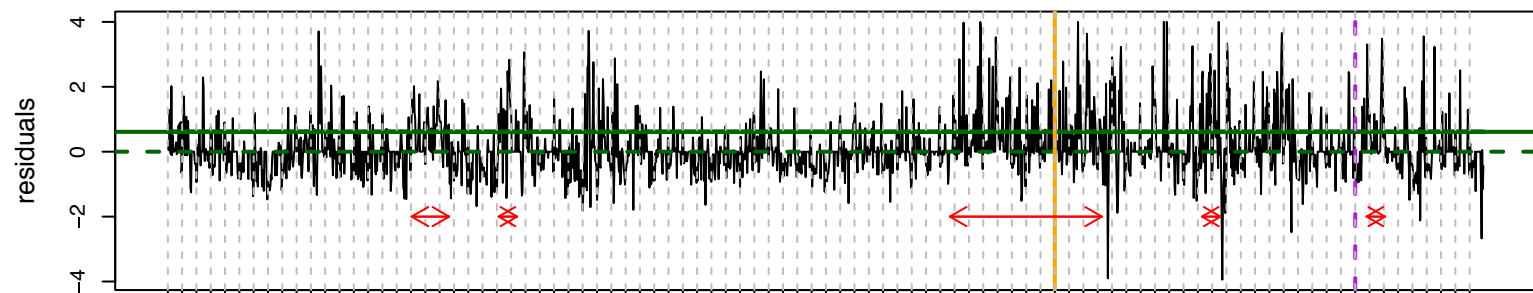

online detection for AUY8KYW

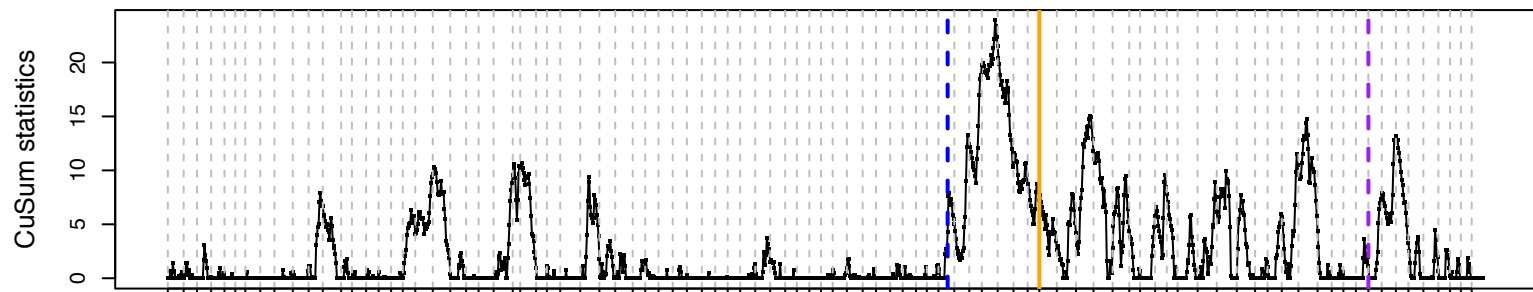

offline detection for A7EM0B6

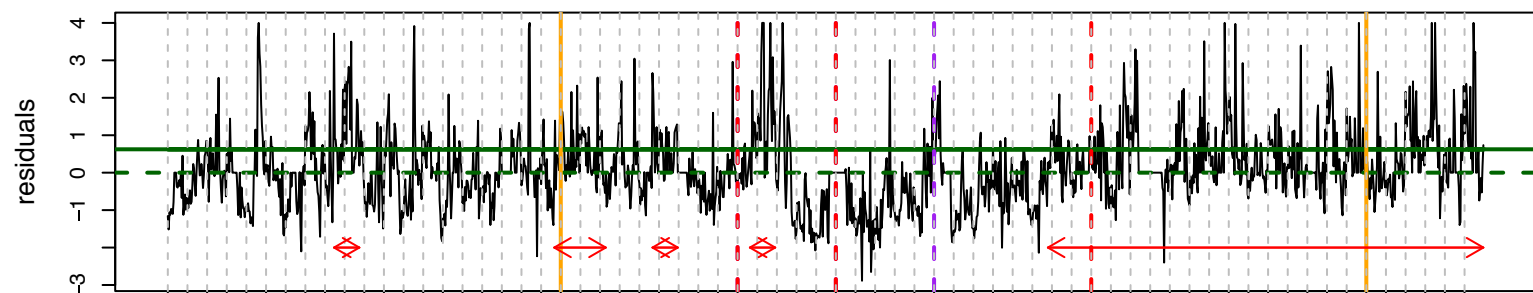

online detection for A7EM0B6

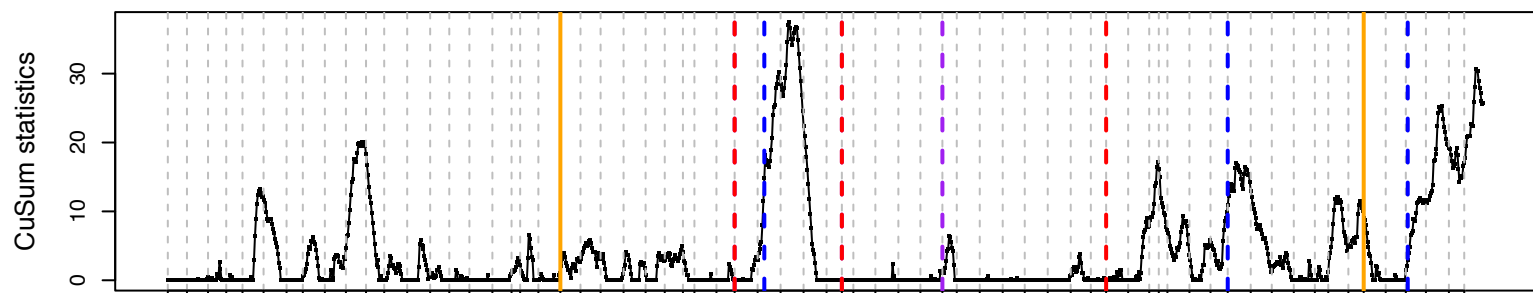

offline detection for AIFDJZB

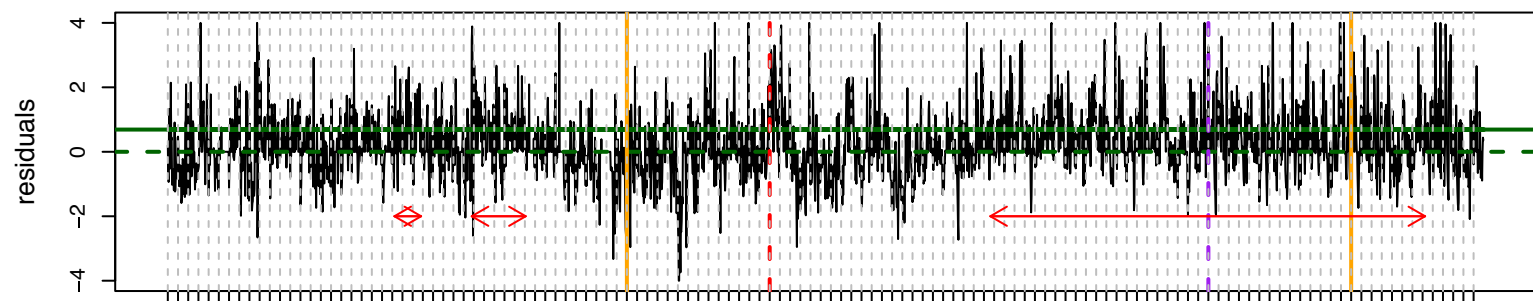

online detection for AIFDJZB

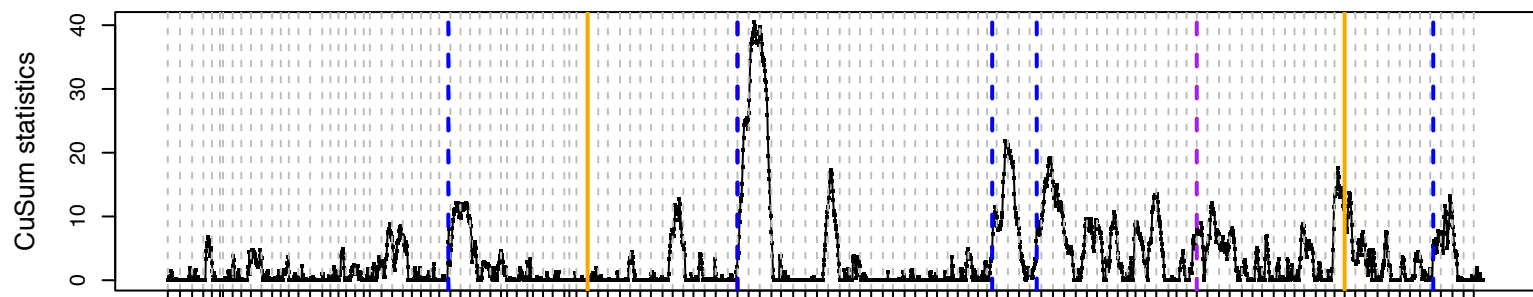

offline detection for A1ZJ41O

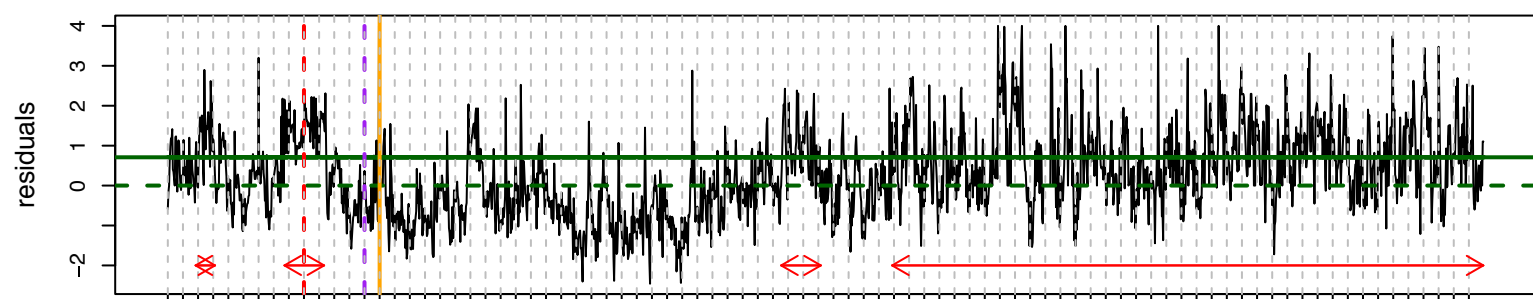

online detection for A1ZJ41O

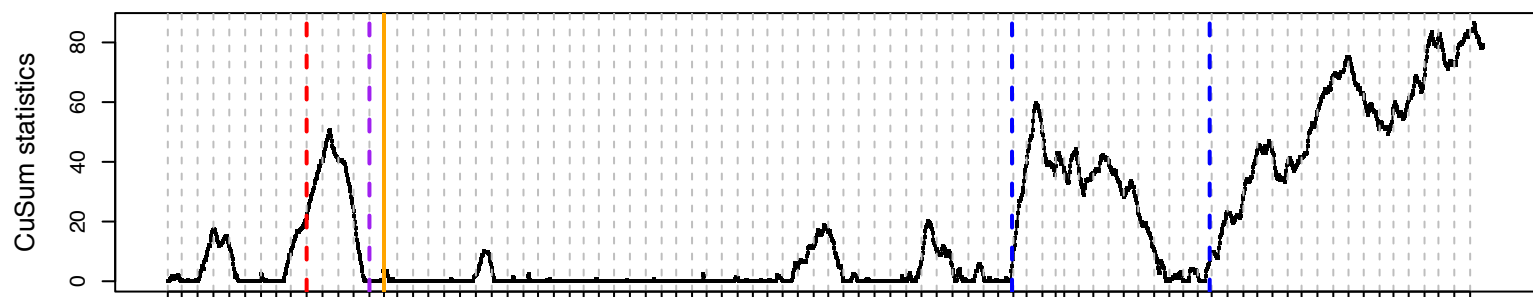

offline detection for AJ7TSV9

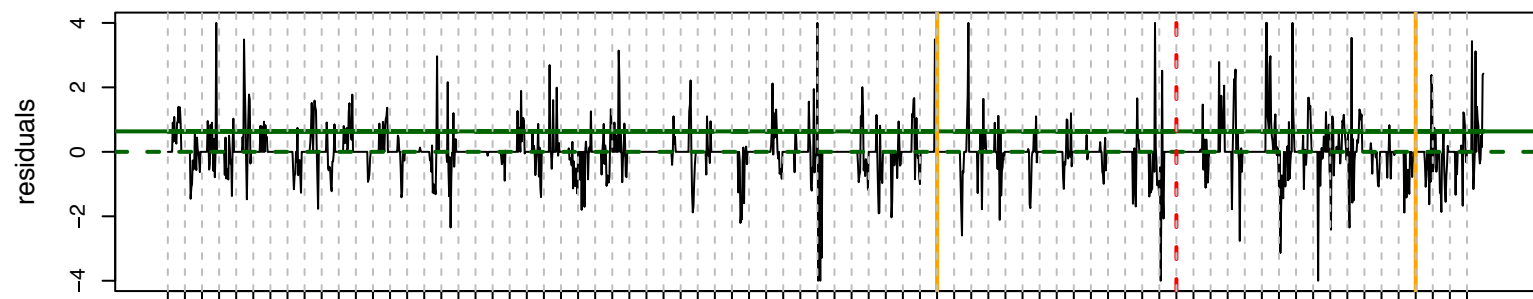

online detection for AJ7TSV9

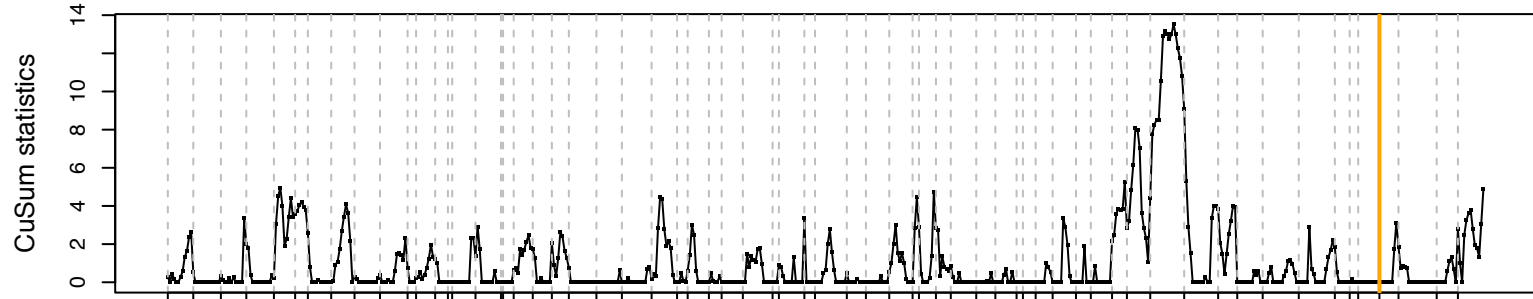

offline detection for A1K5DRI

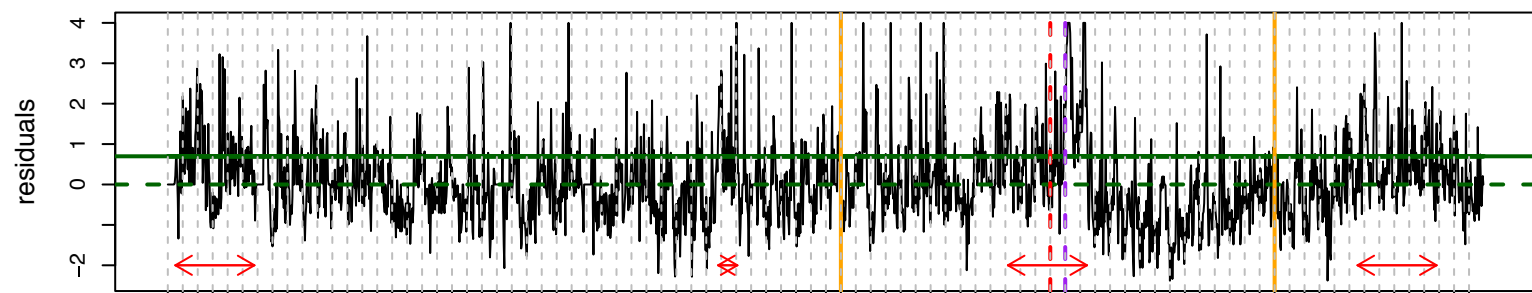

online detection for A1K5DRI

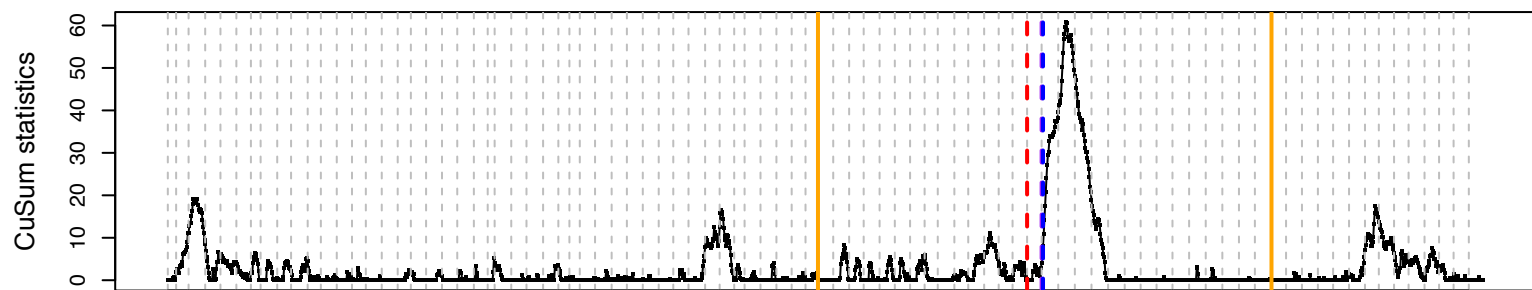

offline detection for AA2KP1S

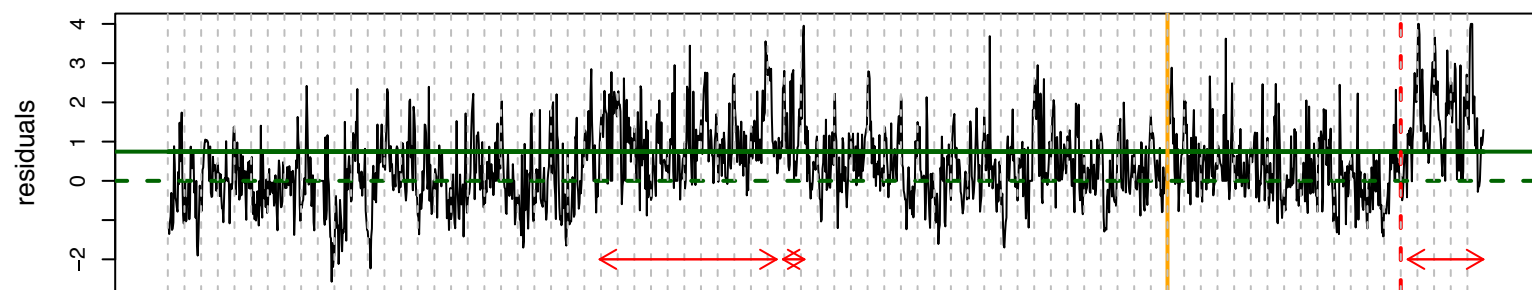

online detection for AA2KP1S

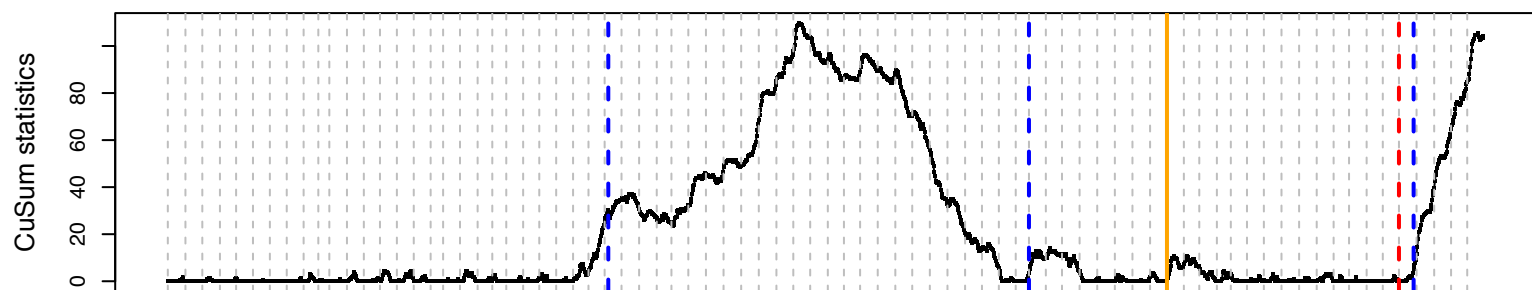

offline detection for AMV7EQF

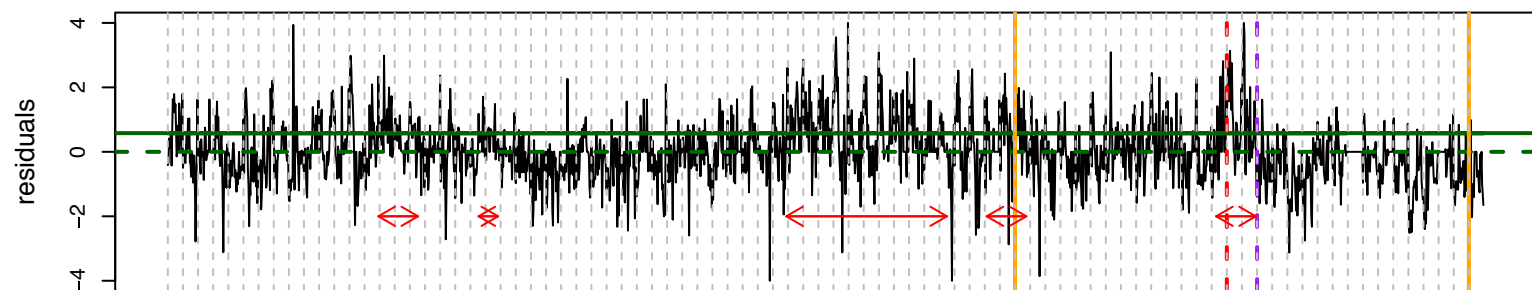

online detection for AMV7EQF

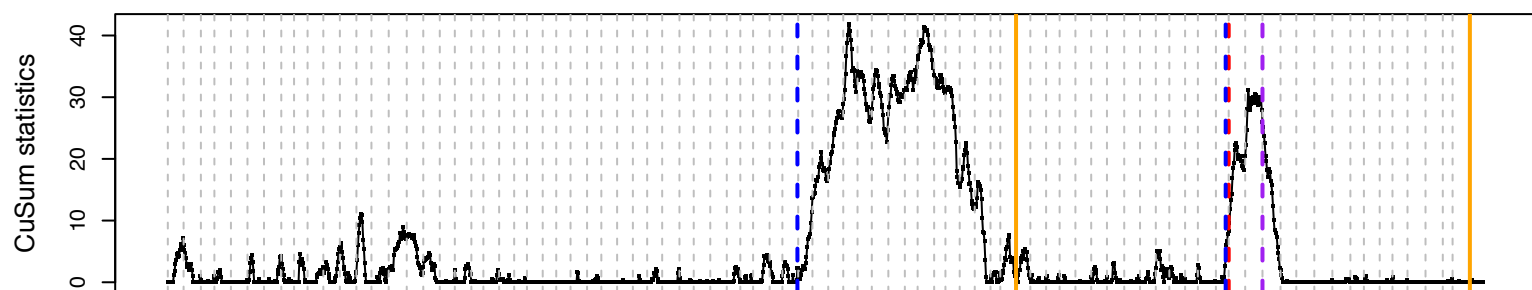



offline detection for AQC0L71

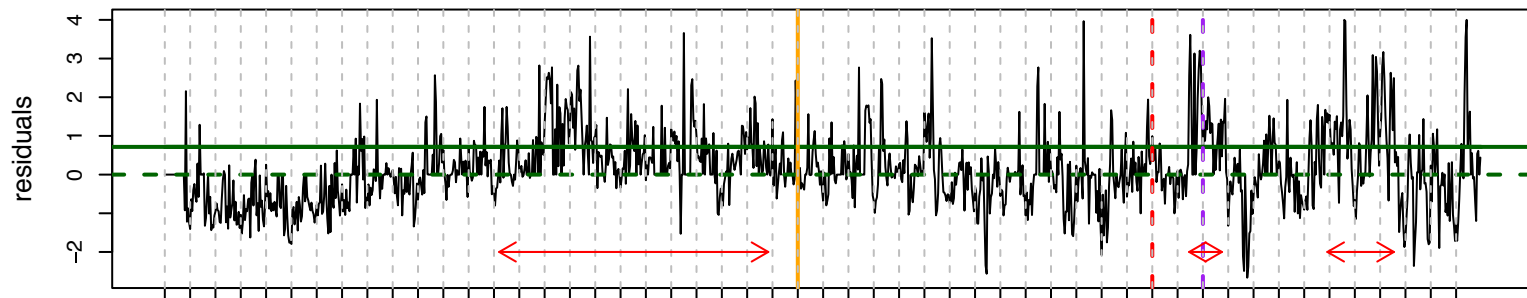

online detection for AQC0L71

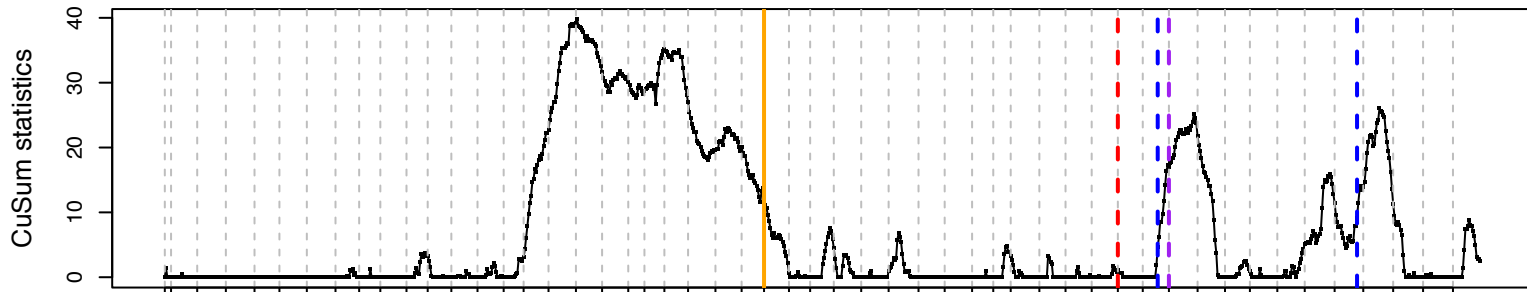

offline detection for AX6281V

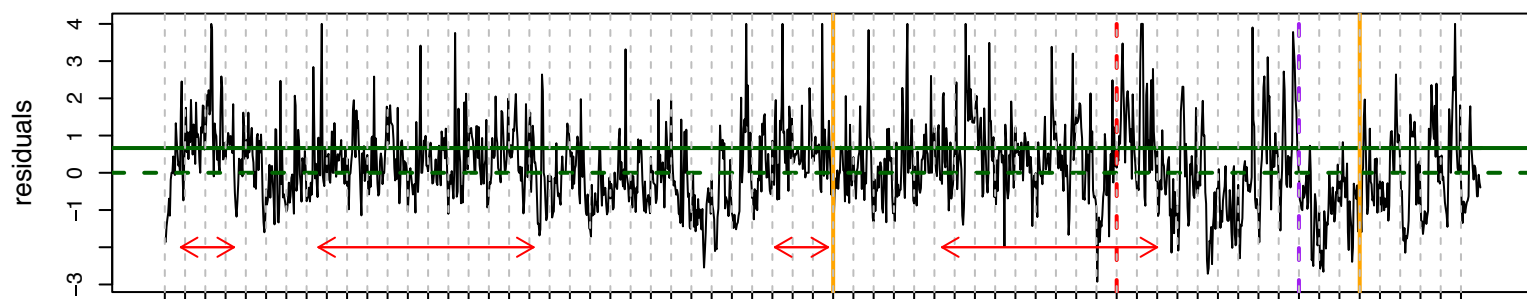

online detection for AX6281V

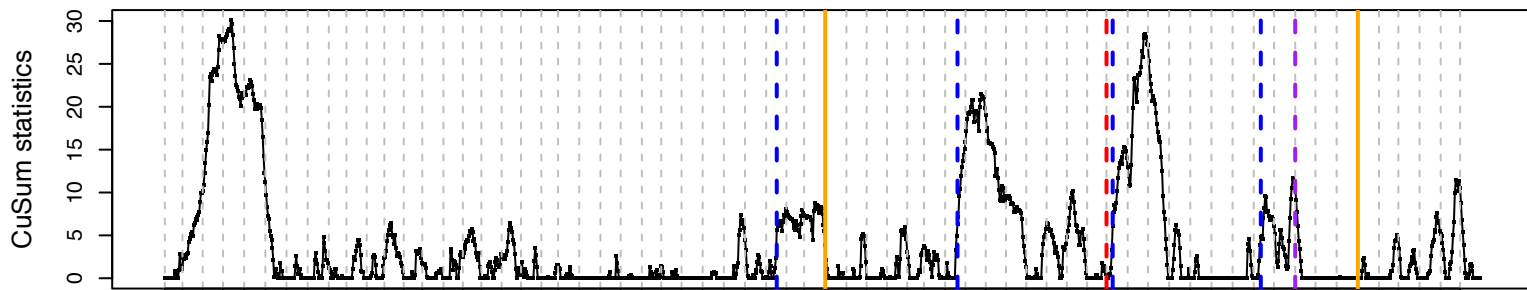

offline detection for AYWIEKR

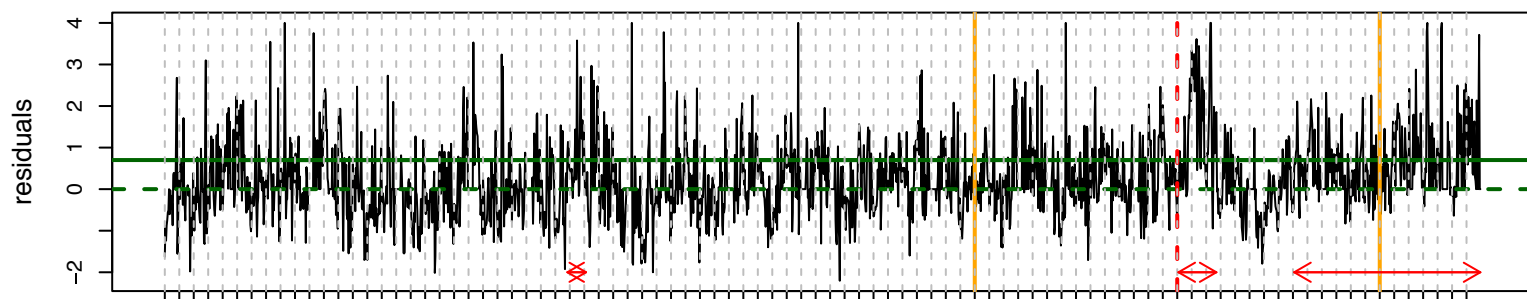

online detection for AYWIEKR

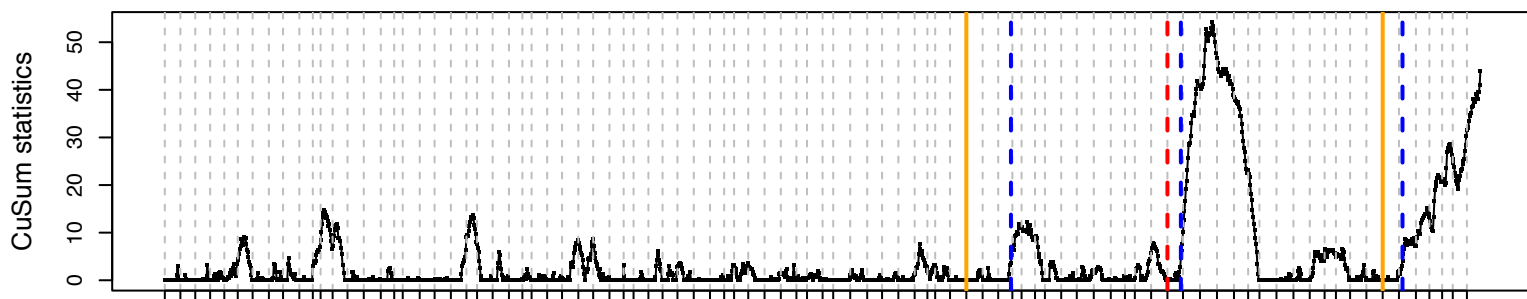

offline detection for A3OU183

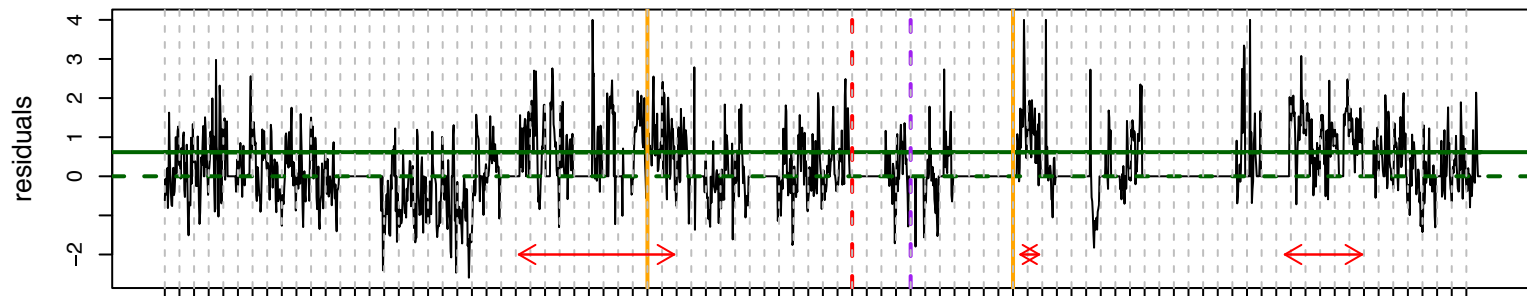

online detection for A3OU183

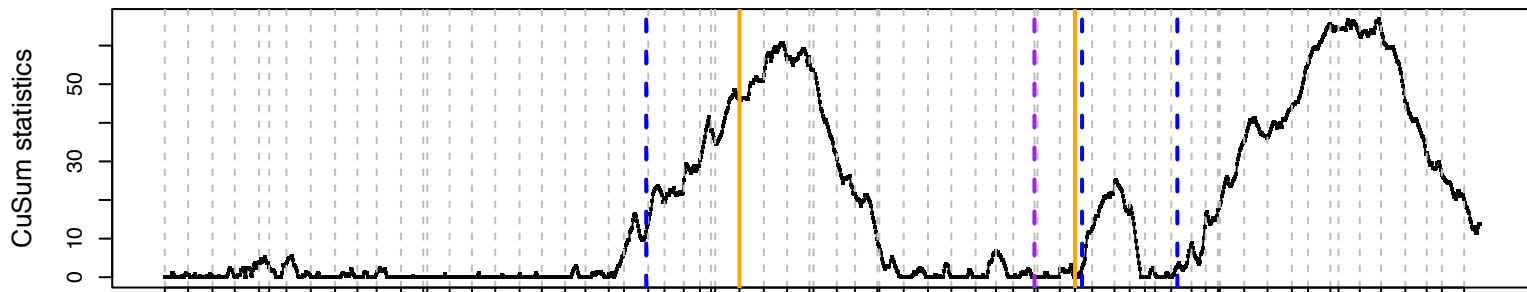

offline detection for AJMQUVV

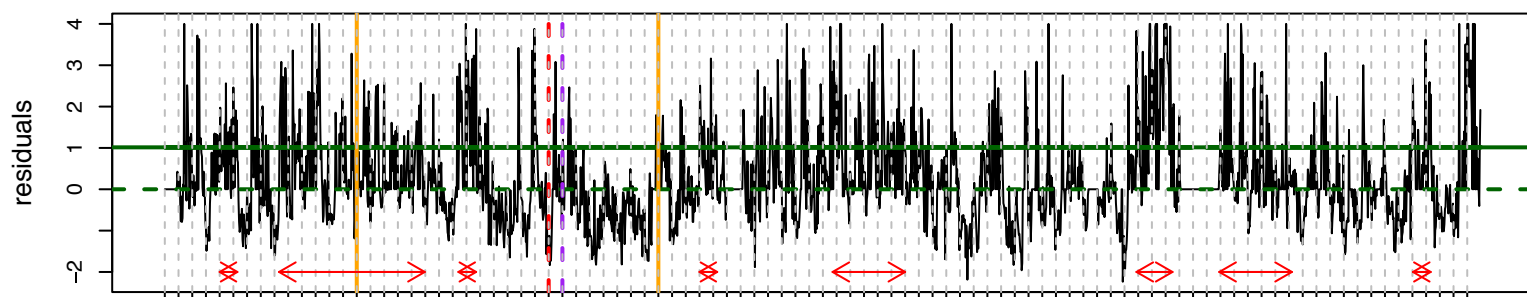

online detection for AJMQUVV

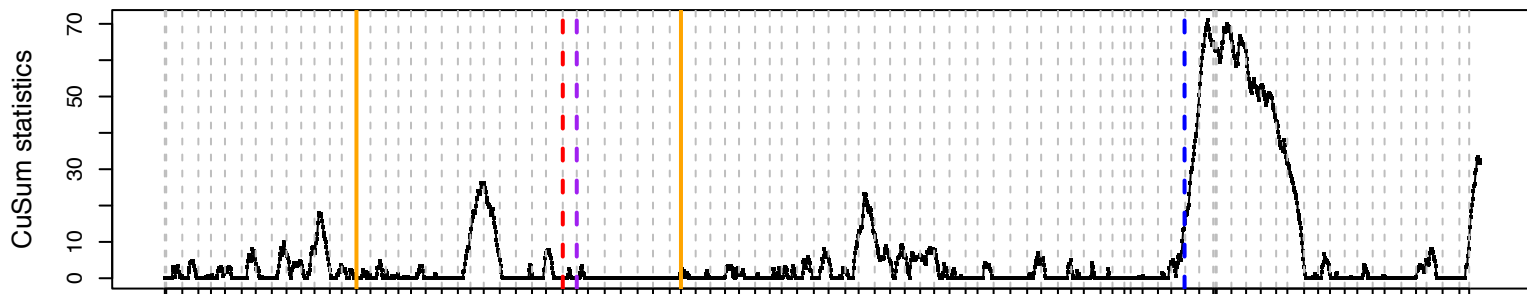

offline detection for A4E0D03

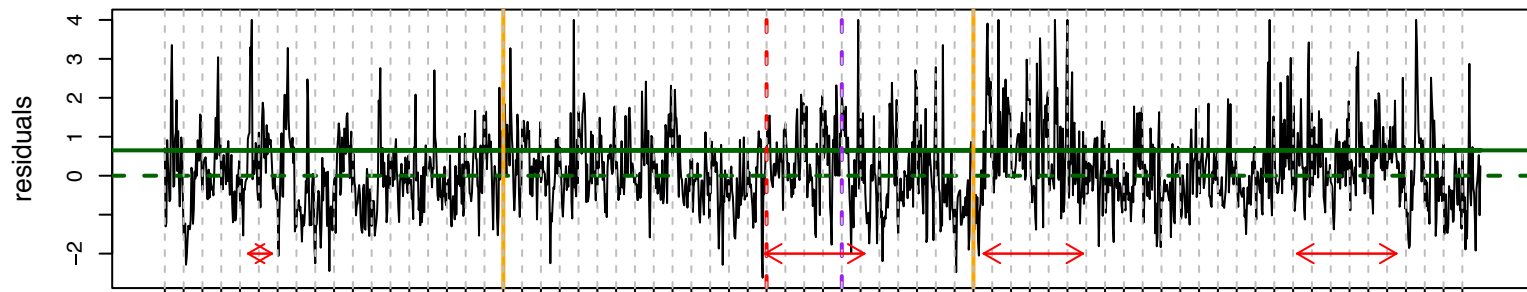

online detection for A4E0D03

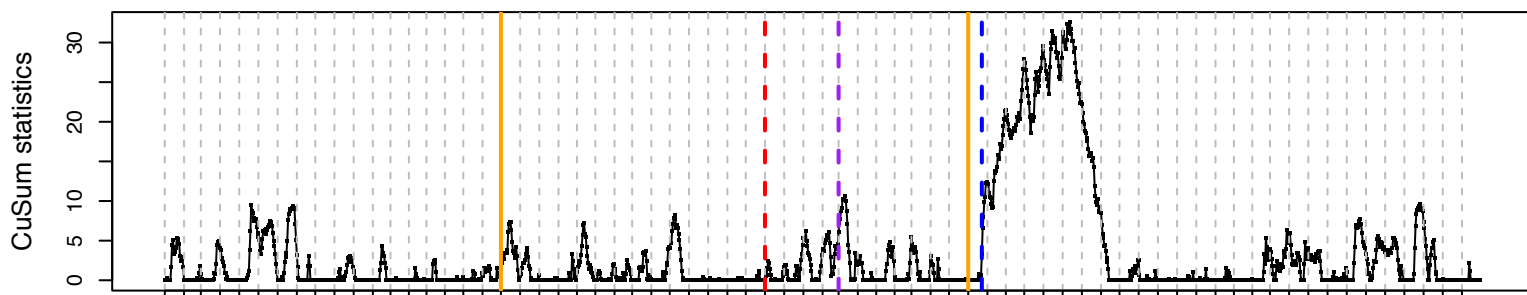

**offline detection for A0KX894**

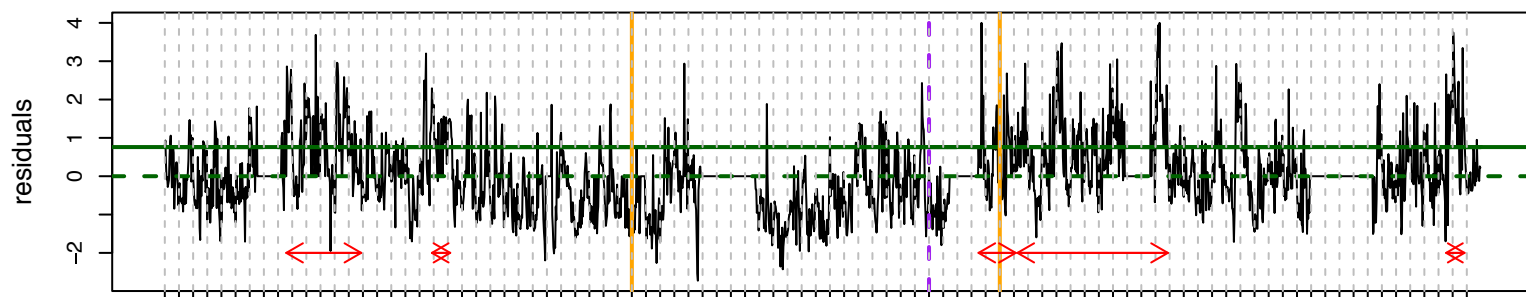

**online detection for A0KX894**

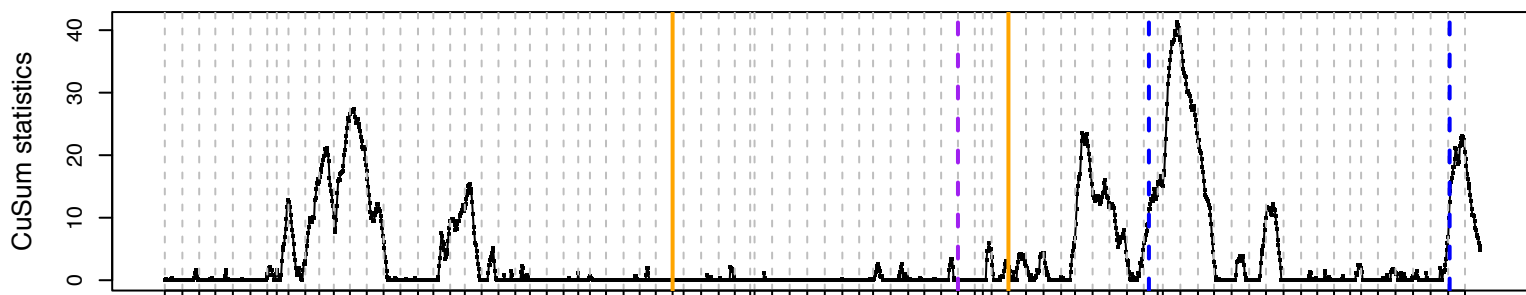

**offline detection for AURCTAK**

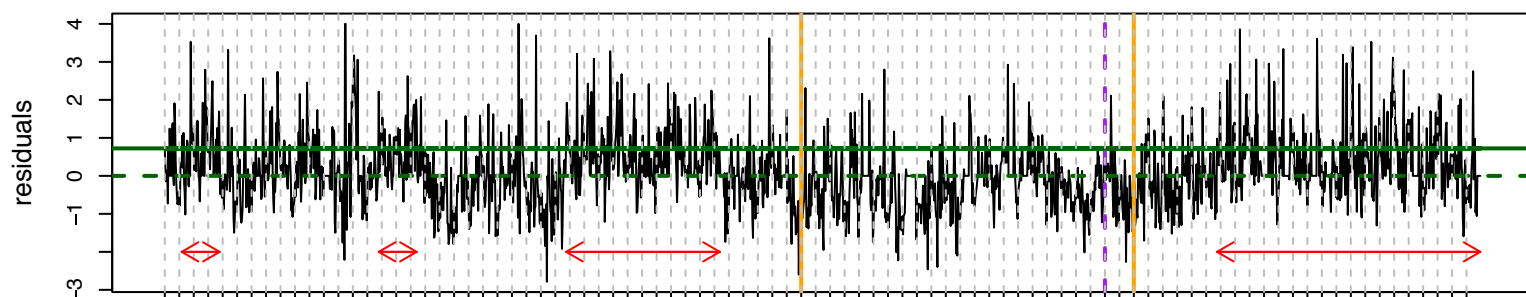

**online detection for AURCTAK**

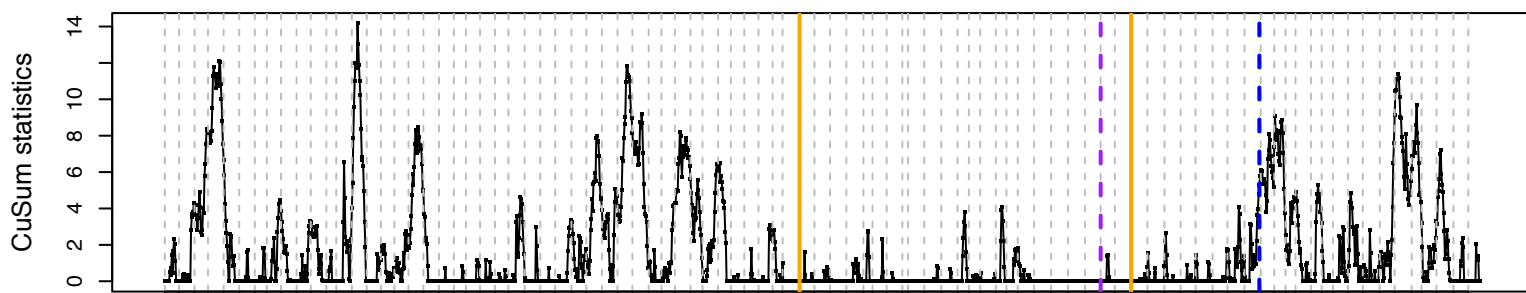

**offline detection for AFPB8J2**

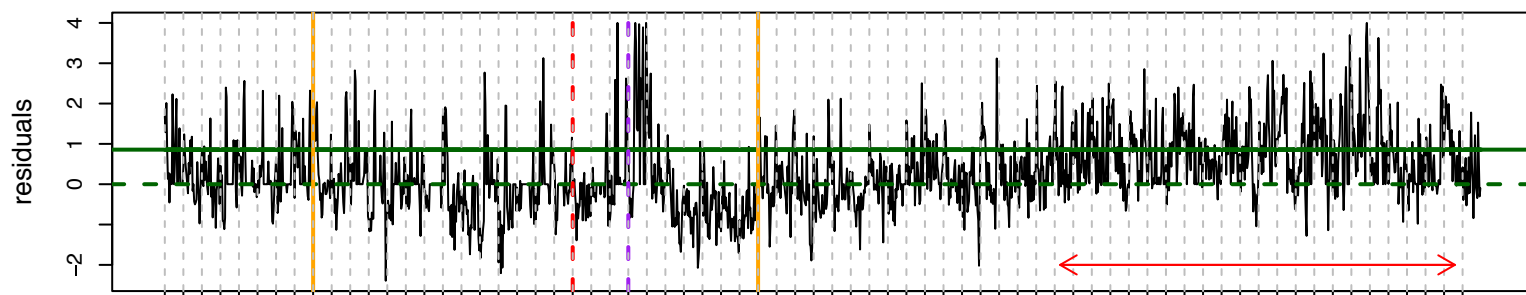

**online detection for AFPB8J2**

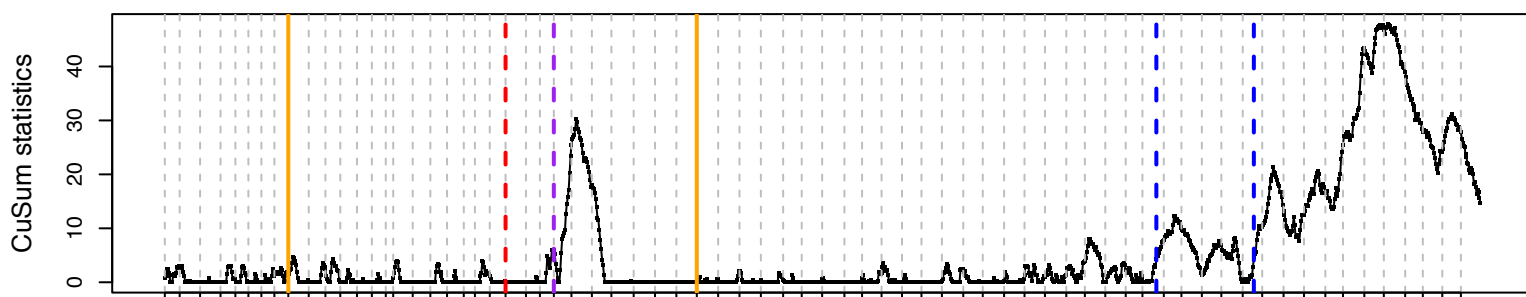

offline detection for A36HR6Y

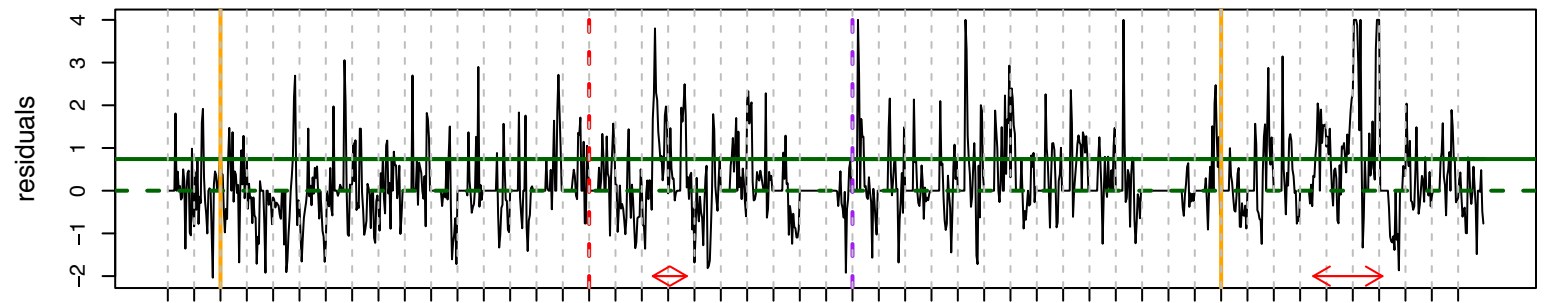

online detection for A36HR6Y

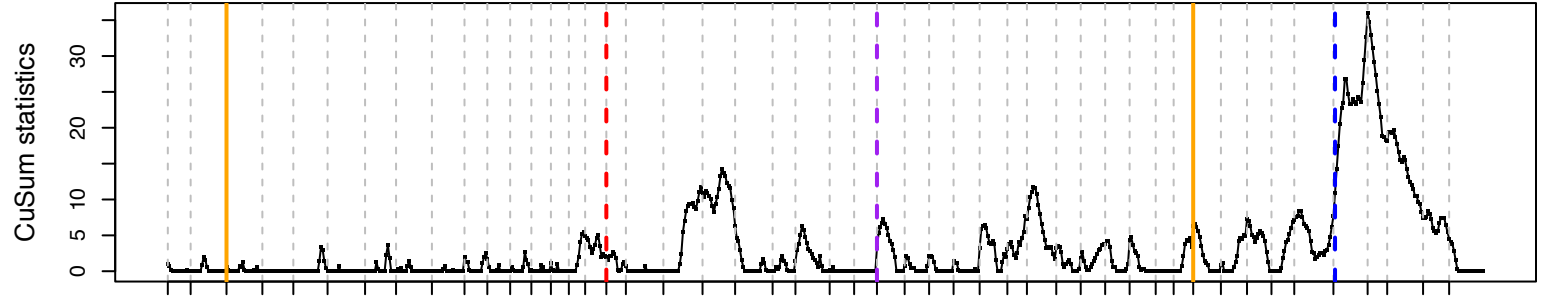

# Supplemental Figure S3

Heart Rate Over Steps (HROS)

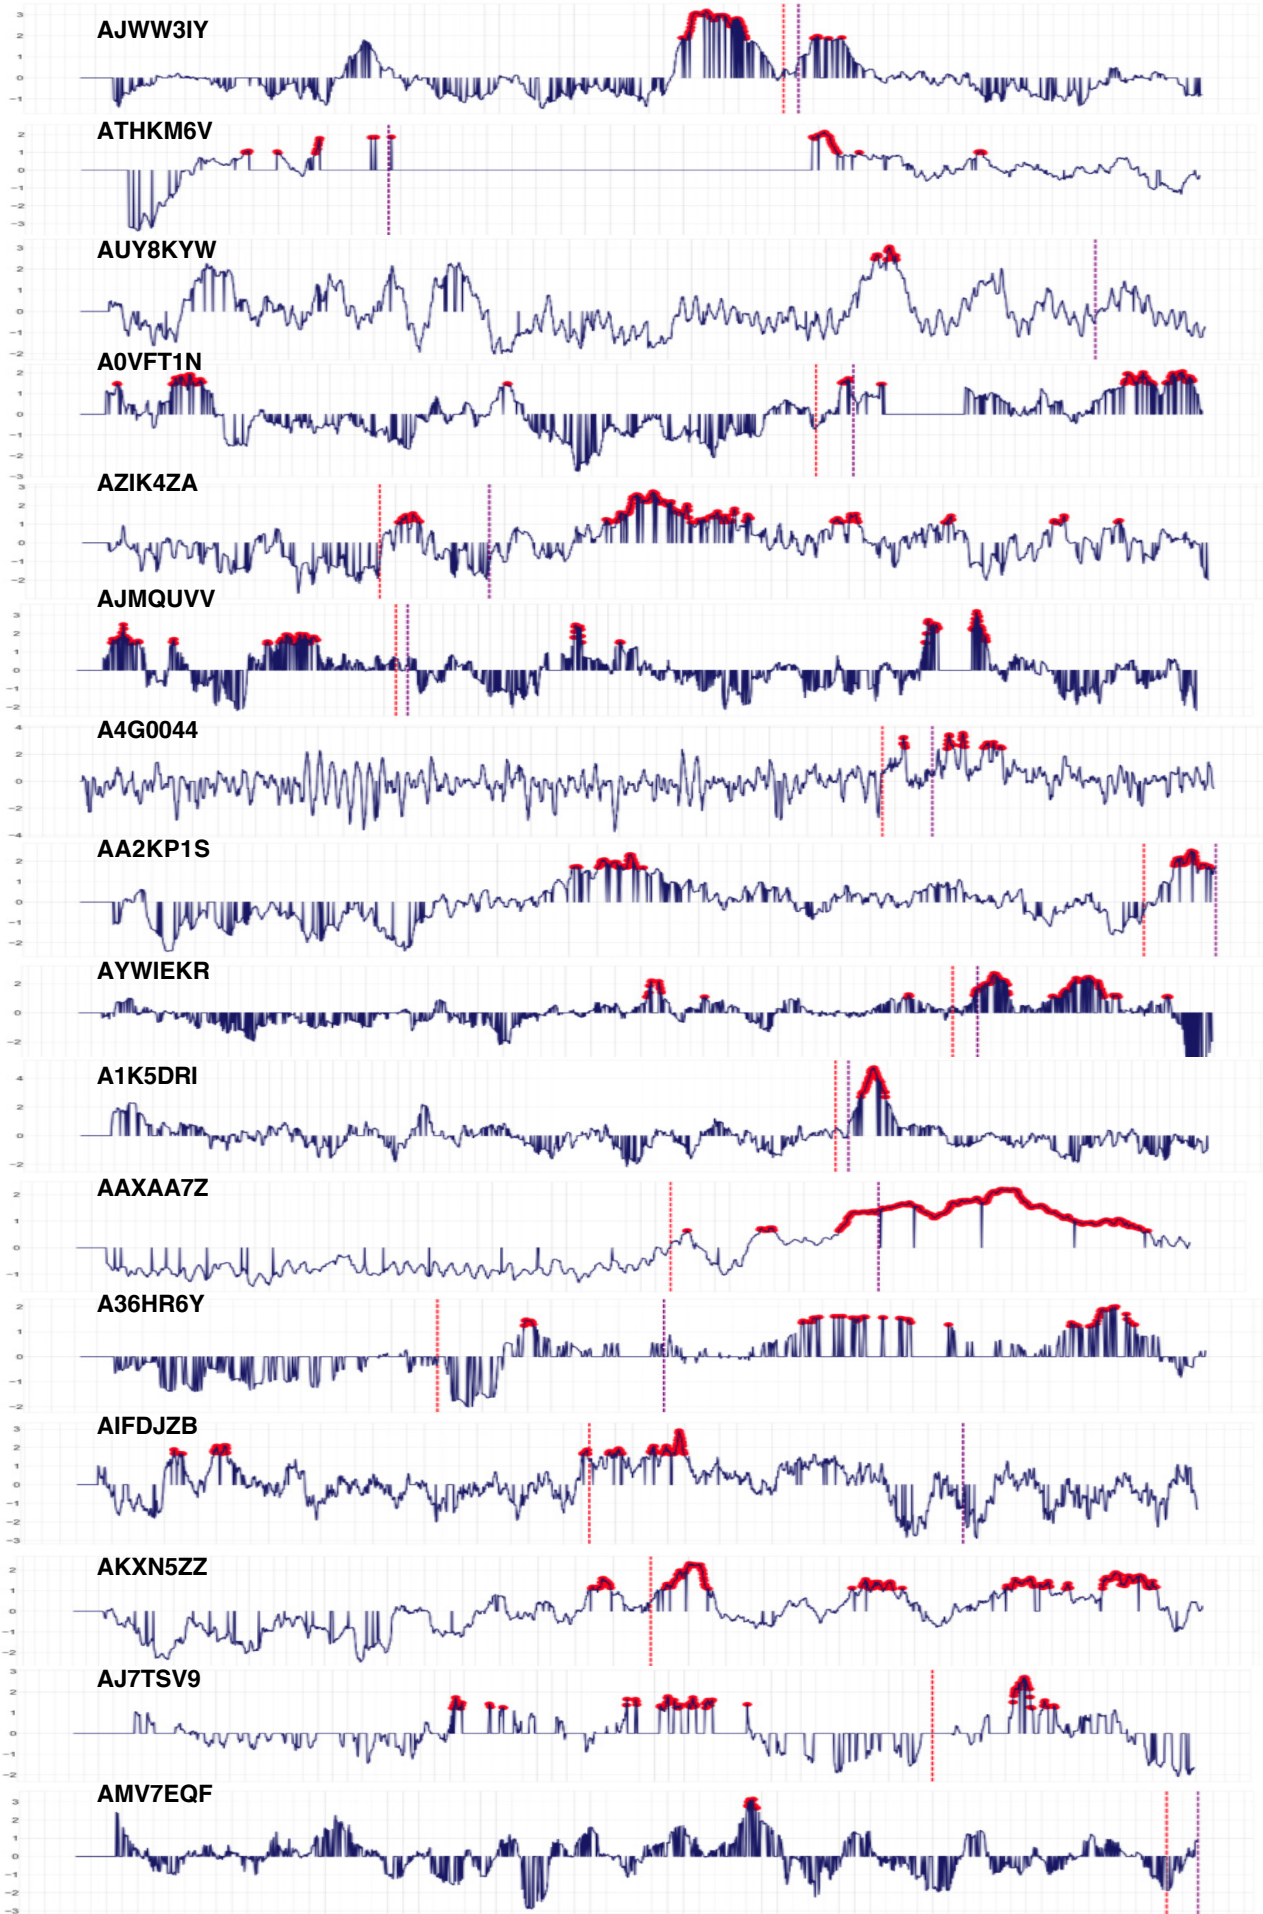

Heart Rate Over Steps (HROS)

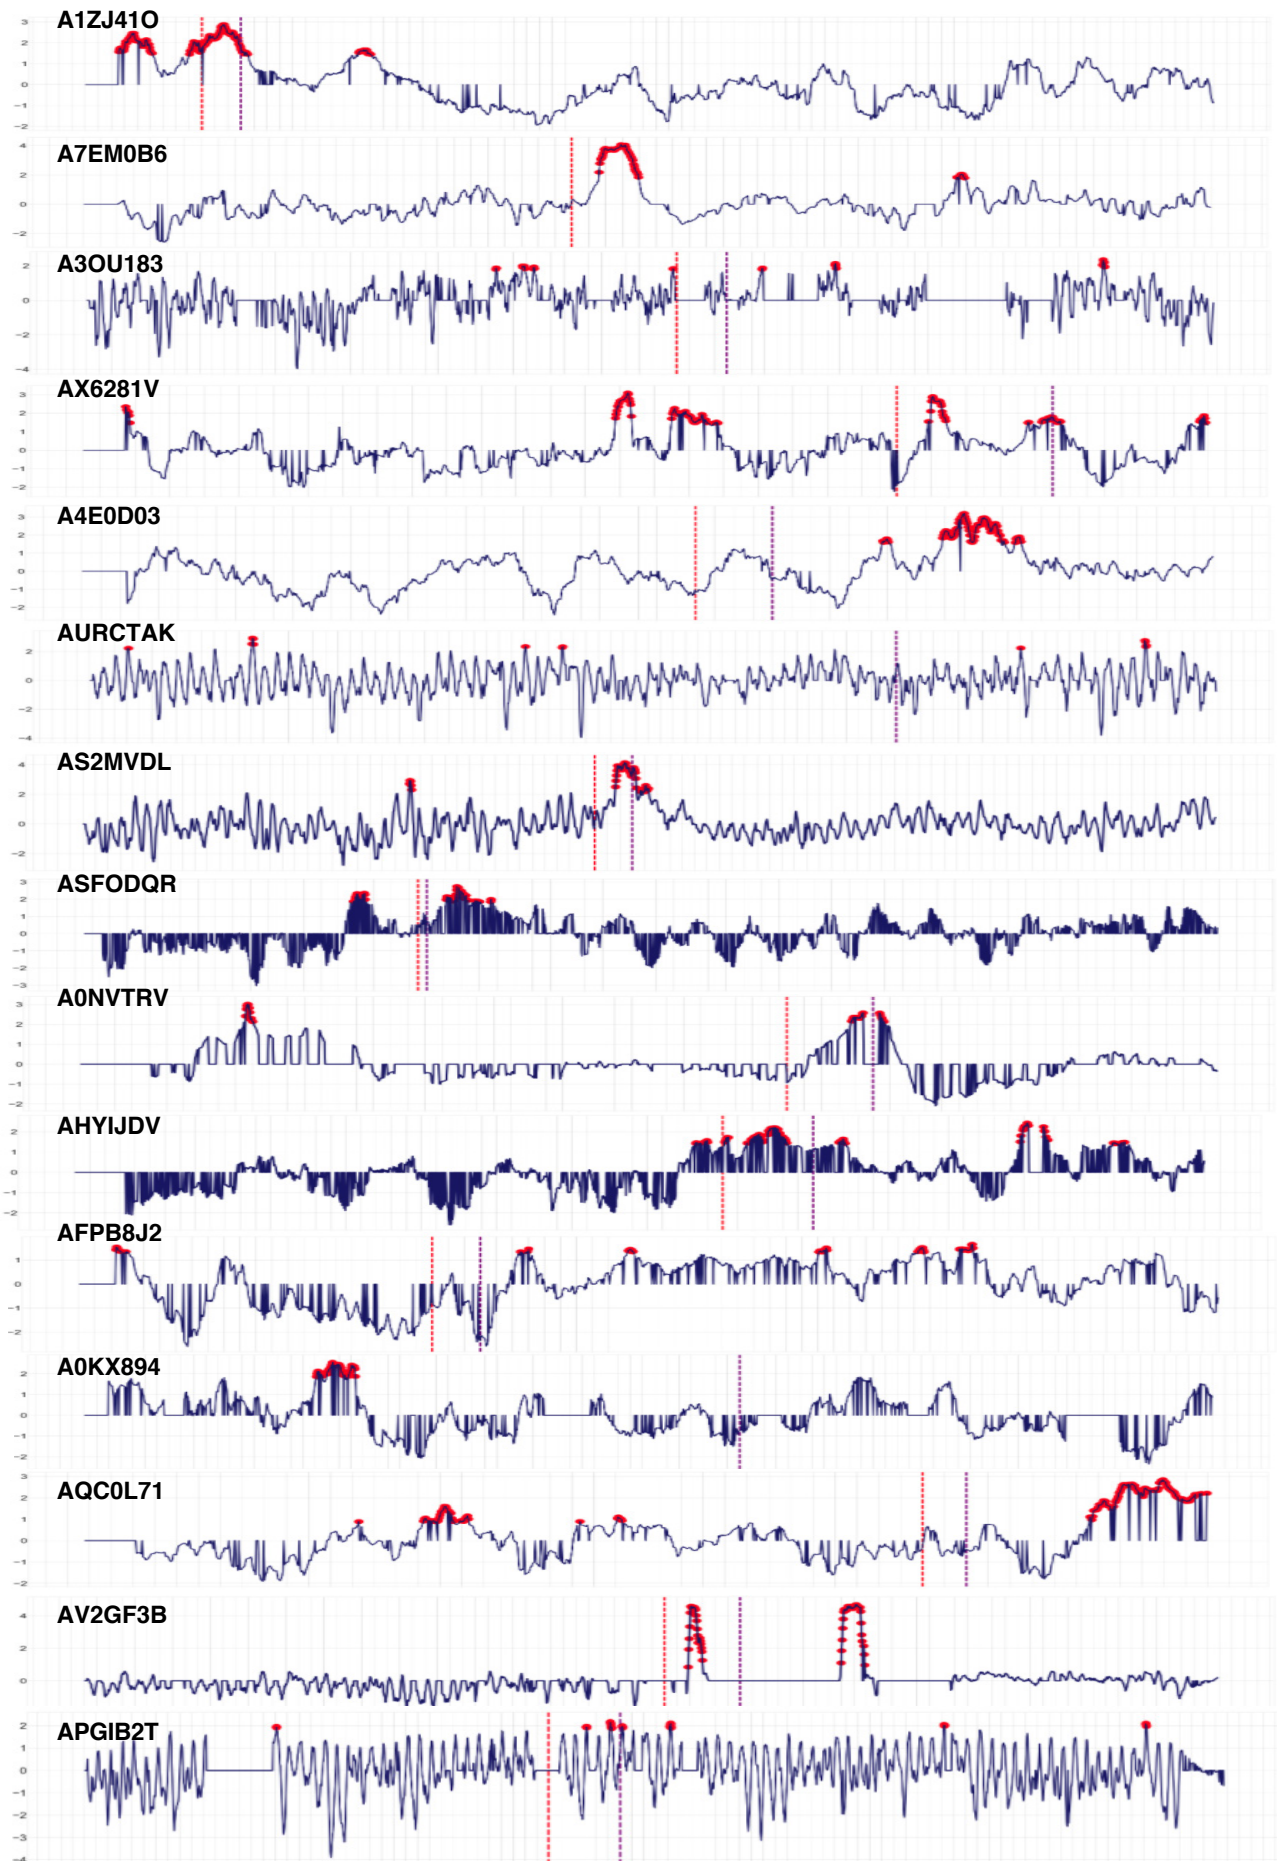

# Supplemental Figure S4

## A

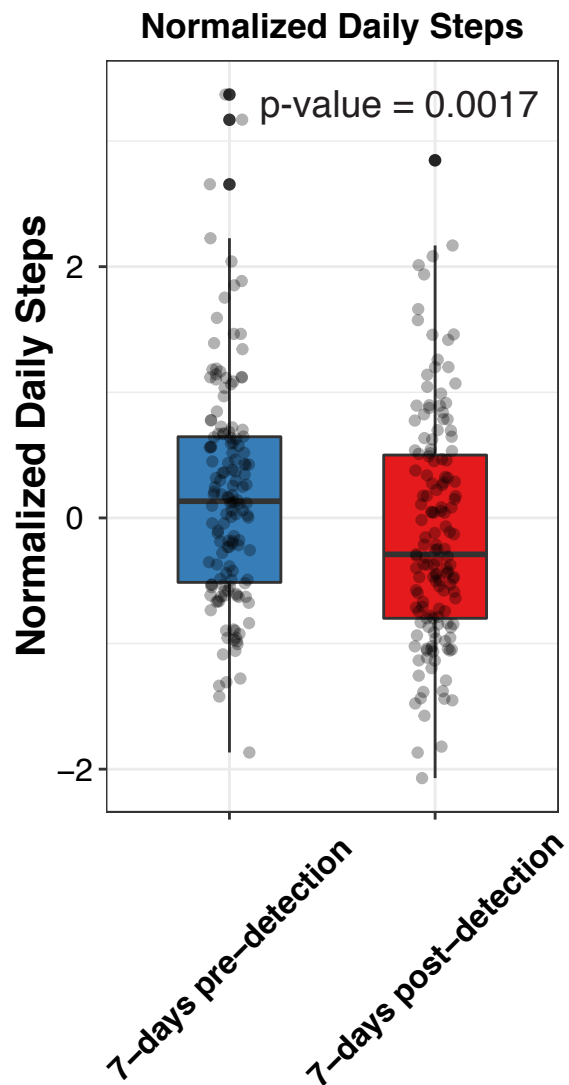

## B

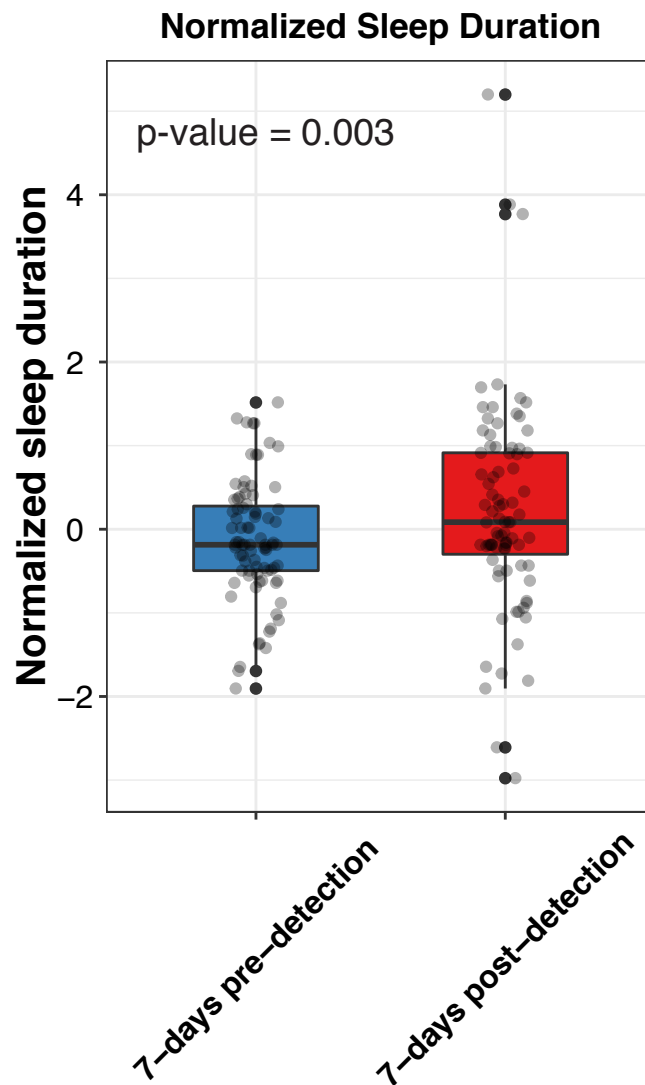

# Supplemental Figure S5

## online detection for AJWW3IY from long term data

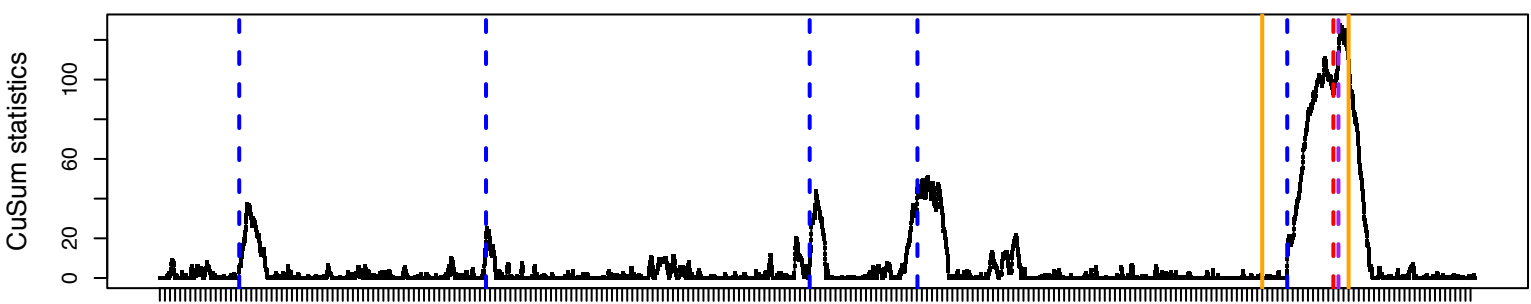

## online detection for AAXAA7Z from long term data

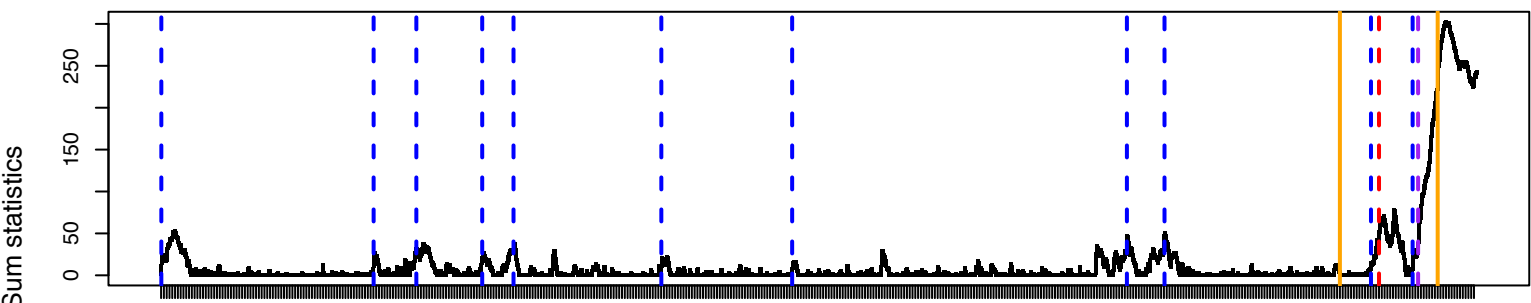

## online detection for AIFDJZB from long term data

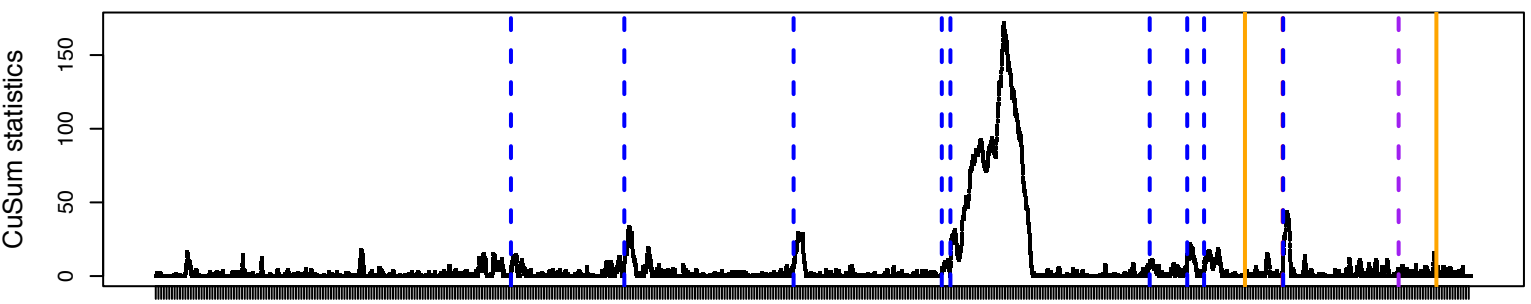

## online detection for ASFODQR from long term data

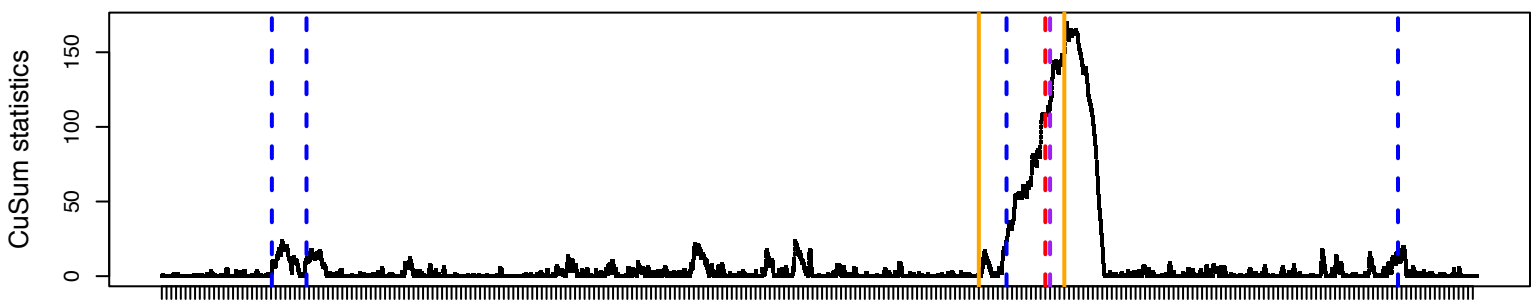

Supplement: Supplementary file [file 2020.07.06.20147512-1.pdf]
